# Supplementary material for: Systematic review of behavioural smoking cessation interventions for older smokers from deprived backgrounds
Source: PubMed Central journal article supplement — BMJ Open. 2019 Nov 2;9(11):e032727. doi: 10.1136/bmjopen-2019-032727 (PMC6830832; doi:10.1136/bmjopen-2019-032727), 2019-11-02
Supplement: bmjopen-2019-032727.draft_revisions.pdf [file bmjopen-2019-032727.draft_revisions.pdf]

# BMJ Open

BMJ Open is committed to open peer review. As part of this commitment we make the peer review history of every article we publish publicly available.

When an article is published we post the peer reviewers' comments and the authors' responses online. We also post the versions of the paper that were used during peer review. These are the versions that the peer review comments apply to.

The versions of the paper that follow are the versions that were submitted during the peer review process. They are not the versions of record or the final published versions. They should not be cited or distributed as the published version of this manuscript.

BMJ Open is an open access journal and the full, final, typeset and author-corrected version of record of the manuscript is available on our site with no access controls, subscription charges or pay-per-view fees (<http://bmjopen.bmj.com>).

If you have any questions on BMJ Open's open peer review process please email [info.bmjopen@bmj.com](mailto:info.bmjopen@bmj.com)

# BMJ Open

## Systematic review of behavioural smoking cessation interventions for older smokers from deprived backgrounds

|                               |                                                                                                                                                                                                                                                                                                                                                                                                                       |
|-------------------------------|-----------------------------------------------------------------------------------------------------------------------------------------------------------------------------------------------------------------------------------------------------------------------------------------------------------------------------------------------------------------------------------------------------------------------|
| Journal:                      | <i>BMJ Open</i>                                                                                                                                                                                                                                                                                                                                                                                                       |
| Manuscript ID                 | bmjopen-2019-032727                                                                                                                                                                                                                                                                                                                                                                                                   |
| Article Type:                 | Research                                                                                                                                                                                                                                                                                                                                                                                                              |
| Date Submitted by the Author: | 04-Jul-2019                                                                                                                                                                                                                                                                                                                                                                                                           |
| Complete List of Authors:     | Smith, Pamela; Cardiff University, Division of Population Medicine<br>Poole, Ria; Cardiff University, Division of Population Medicine<br>Mann, Mala; Cardiff University, Specialist Unit for Review Evidence<br>Nelson, Annmarie; Cardiff University, Marie Curie Research Centre<br>Moore, Graham; Cardiff University, School of Social Sciences<br>Brain, Kate; Cardiff University, Division of Population Medicine |
| Keywords:                     | SOCIAL MEDICINE, PUBLIC HEALTH, PREVENTIVE MEDICINE                                                                                                                                                                                                                                                                                                                                                                   |
|                               |                                                                                                                                                                                                                                                                                                                                                                                                                       |

SCHOLARONE™  
Manuscripts

1  
2  
3 Systematic review of behavioural smoking cessation interventions for older smokers from  
4  
5  
6 deprived backgrounds  
7

8 Authors: Pamela Smith\*<sup>a</sup>, Dr Ria Poole<sup>a</sup>, Mala Mann<sup>b</sup>, Prof Annmarie Nelson<sup>c</sup>, Dr Graham  
9  
10 Moore<sup>d</sup>, Prof Kate Brain<sup>a</sup>  
11  
12

13  
14 \*corresponding author

15 [Smithp18@cardiff.ac.uk](mailto:Smithp18@cardiff.ac.uk)

16  
17 8<sup>th</sup> Floor, Neuadd Meirionnydd, Heath Park, CF14 4YS

18  
19 02920 687695  
20  
21  
22  
23

24 <sup>a</sup> Division of Population Medicine, Cardiff University, Heath Park, Cardiff, UK, CF14 4YS

25 <sup>b</sup> Cardiff University, Specialist Unit for Review Evidence, Cardiff, UK, CF14 4YS

26 <sup>c</sup> Cardiff University, Marie Curie Research Centre, Cardiff, UK, CF14 4YS

27 <sup>d</sup> Cardiff University, School of Social Sciences, 1-3 Museum Place, Cardiff, UK CF10 3BD  
28  
29  
30  
31

32 Word count: 3,108  
33  
34  
35  
36  
37  
38  
39  
40  
41  
42  
43  
44  
45  
46  
47  
48  
49  
50  
51  
52  
53  
54  
55  
56  
57  
58  
59  
60

## ABSTRACT

### Introduction

The associations between smoking prevalence, socioeconomic group and lung cancer outcomes are well established. There is currently limited evidence for how inequalities could be addressed through specific smoking cessation interventions (SCIs) for a lung screening eligible population. This systematic review aims to identify the behavioural elements of SCIs used in older adults from low socioeconomic groups, and to examine their impact on smoking abstinence and psychosocial variables.

### Method

Systematic searches of relevant databases were conducted. Included studies examined the characteristics of SCIs and their impact on outcomes of interest including smoking abstinence, quit motivation, nicotine dependence, perceived social influence and quit determination. Included studies were restricted to deprived older adults who are at (or approaching) eligibility for lung cancer screening. Narrative data synthesis was conducted.

### Results

Eleven studies met the inclusion criteria. Methodological quality of the studies was variable, with the majority using self-reported smoking cessation and varying length of follow-up. There were limited data to identify the optimal form of behavioural SCI for the target population; however, behavioural counselling that is delivered in a community setting and tailored to individual needs demonstrated a positive impact on smoking outcomes.

### Conclusion

Tailored, multimodal behavioural interventions that can be embedded within disadvantaged communities could potentially support cessation among older, deprived smokers. Further

1  
2  
3 rigorous, high quality research is needed to understand the effectiveness of SCIs for the target  
4  
5 population.  
6  
7

8  
9 Keywords: Smoking, smoking cessation, older, deprived, lung cancer

10  
11 Article summary  
12

- 13  
14
- 15 • The associations between smoking prevalence, socioeconomic group and lung cancer  
16 outcomes are well established  
17
  - 18 • There is a current gap in knowledge about the most suitable form of behavioural  
19 smoking cessation intervention for older, deprived smokers who are most likely to be  
20 eligible for lung screening  
21  
22
  - 23 • The review suggests that tailored, multimodal interventions could support smoking  
24 cessation for those most likely to be eligible for lung screening however the studies  
25 included in the review were heterogeneous in design, SCI modality, sample size,  
26 intervention timing and measurement of smoking abstinence  
27  
28
  - 29 • There is a lack of rigorous, high quality research and randomised controlled trials  
30 should be conducted to test the effectiveness of SCIs for this population  
31  
32  
33  
34  
35  
36  
37  
38  
39  
40  
41  
42  
43  
44  
45  
46  
47  
48  
49  
50  
51  
52  
53  
54  
55  
56  
57  
58  
59  
60

## INTRODUCTION

Smoking is the leading global cause of death and disease (1). Data show that there are approximately 7.4 million adult cigarette smokers in the United Kingdom (2, 3). The associations between smoking prevalence, socioeconomic group and lung cancer outcomes are well established, with higher smoking rates and greater lung cancer incidence and mortality (4-6) among people living in deprived areas.

Twenty-six percent of smokers in the UK are aged 50 years or older (3); these individuals tend to have long standing smoking histories, are often from deprived communities and are a population that are likely to be eligible for future lung screening implementation. The US Preventive Services Task Force recommends annual Low-Dose Computed Tomography (LDCT) screening for those who are high-risk heavy smokers, including adults aged 55-80 years old, with a 30 pack-year history (7). LDCT lung cancer screening has the potential to prompt a smoking cessation attempt and evidence for integrated smoking cessation support is growing (8-11), with research demonstrating promising results for quit rates when using a combined approach of smoking cessation support in a lung screening setting (9).

In order to implement appropriate smoking cessation intervention (SCIs) in a lung screening context, it is important to understand the factors that influence cessation attempts in older, deprived smokers who may be eligible for lung screening. Known barriers to smoking cessation in this population include higher nicotine dependence, less motivation to quit, more life stress, lack of social support and differences in perceptions of smoking (12-14). Smokers from a low socioeconomic background may find quitting more difficult due to lack of support from their family members or community with quit attempts (15), partly due to higher smoking prevalence and normalisation of smoking in their social network (16). Studies

1  
2  
3 suggest that cessation attempts in older smokers are more likely to fail due to heavy nicotine  
4 dependence and insufficient motivating factors such as self-efficacy to quit (17, 18).  
5  
6

7  
8 Using pharmacotherapy with structured behavioural support to assist smoking cessation has  
9 shown promise with disadvantaged smokers (19, 20). Intensive SCIs involving tailored  
10 pharmacotherapy and behavioural counselling to increase self-efficacy are most effective for  
11 deprived smokers (21). However further research is needed to understand specific aspects of  
12 behavioural SCIs, such as mode of delivery, setting, intensity and duration, that could be used  
13 in the LDCT screening context for deprived smokers.  
14  
15  
16  
17  
18  
19  
20  
21  
22

23 A recent review by Iaccarino (22) attempted to identify the best approach for delivering SCIs  
24 in a LDCT screening setting and concluded that the optimal strategy remains unclear. There  
25 is a need to identify gaps in the evidence surrounding the optimal models for integrated  
26 smoking cessation in a lung screening setting, focusing specifically on a disadvantaged lung  
27 screening eligible population, as well as gain a better understanding of what form of SCI may  
28 work best for this population.  
29  
30  
31  
32  
33  
34  
35  
36

37 The aims of this systematic review were to identify the behavioural aspects of SCIs for older,  
38 deprived adults who are eligible (or approaching eligibility) for lung cancer screening, and to  
39 explore which elements of the interventions were most effective in reducing smoking  
40 abstinence and modifying psychosocial variables. The findings from the systematic review  
41 will contribute to further understanding of optimal SCIs for individuals who are a target  
42 population for lung cancer screening.  
43  
44  
45  
46  
47  
48  
49  
50

## 51 **METHODS**

52 The systematic review was registered on PROSPERO (CRD42018088956) and followed the  
53 PRISMA guidelines (23). Throughout all stages of the search, data extraction and quality  
54  
55  
56  
57  
58  
59  
60

appraisal, 20% of studies were double-checked for consistency by another member of the team (RP). All discrepancies were resolved through discussion.

### Search strategy

The literature was searched until November 2018 on electronic databases: Medline, EMBASE, PsychInfo and CINAHL. Search terms related to smoking cessation, SCIs and socioeconomic status were used (Table 1). To limit restricting the search in relation to age, papers were manually screened to identify studies that used a relevant sample.

Table 1: PICO tool

| PICO         | Description                                                                                                                                                                                                   | Equation used for search                                                                                                                                                                               |
|--------------|---------------------------------------------------------------------------------------------------------------------------------------------------------------------------------------------------------------|--------------------------------------------------------------------------------------------------------------------------------------------------------------------------------------------------------|
| Population   | Individuals from socioeconomically deprived groups, defined through either individual or area level indicators                                                                                                | (Depriv* or disadvantage* or inequit* or socioeconomic or socio-economic or sociodemographic or socio-demographic or social class or deprivation group or poverty or low income or social welfare).tw. |
| Intervention | A range of interventions including individual and group counselling, self-help materials, pharmacological interventions (e.g. NRT), social and environmental support, comprehensive programmes and incentives | Smoking Cessation/ and (intervention* or initiative* or strategy* or program* or scheme* or outcome* or approach* ).tw.                                                                                |
| Comparison   | All study types with a pre/post intervention and/or a control group                                                                                                                                           | -                                                                                                                                                                                                      |
| Outcome      | Primary outcome: smoking abstinence<br>Secondary outcome: Moderating variables (e.g. nicotine dependence, quit motivation, self-efficacy, social support and influences)                                      | ((nicotine or tobacco or smok* or cigarette) adj (quit* or stop* or cess* or cease* or cut down or "giv* up" or reduc* )).tw.                                                                          |

### Study eligibility criteria

All searches were restricted to high-income countries (24). Included publications reported on '*Socioeconomically deprived groups*' that defined their sample through individual level



1  
2  
3 indicators (e.g. educational level, income) or area level indicators (e.g. postcode). 'Older  
4  
5 adults', defined as aged 50 years + (or when the majority of the sample was aged 40+), were  
6  
7 included to represent a sample at or approaching lung cancer screening age (25). The review  
8  
9 included studies that examined behavioural aspects of SCIs and outcomes including smoking  
10  
11 abstinence and psychosocial variables such as quit motivation, nicotine dependence,  
12  
13 perceived social influence and quit determination.  
14  
15

### 16 17 **Data extraction and synthesis**

18  
19  
20 Study outcomes and selected study features were extracted. Where relevant, statistical  
21  
22 associations between variables are described in order to examine relationships within and  
23  
24 between the included studies. Due to the heterogeneity of included studies, a narrative  
25  
26 synthesis was performed using guidance outlined by Popay (26) and organised under relevant  
27  
28 behavioural intervention elements.  
29  
30  
31

### 32 33 **Critical Appraisal**

34  
35  
36 The methodological quality of included studies and risk of bias was assessed using an  
37  
38 adapted Critical Appraisal Skills Programme (CASP) tool (27). Quality was assessed  
39  
40 according to each domain on the checklist including rationale, study design, recruitment,  
41  
42 sample size, data collection and analysis, ethical issues, reporting of findings and contribution  
43  
44 to research. The CASP tool was adapted to address quality of methods for verifying smoking  
45  
46 abstinence, intervention type, and socioeconomic and age variation within the sample.  
47  
48  
49 Overall quality was categorised as high, medium or low.  
50  
51

### 52 53 **Patient and Public Involvement**

54  
55 Patient and public involvement was not adopted for the review.  
56  
57  
58  
59  
60

## RESULTS

Eleven studies met the inclusion criteria (Figure 1). Nine of the 11 studies were quantitative (28-36) and two were mixed-methods design (37, 38). Three of the 11 studies were randomised control trials, with the remaining using a range of non-randomised designs. Two of the included studies (28, 34) were conducted in a lung-screening context. Quality of studies was high (n=2), medium (n=5) and low (n=4). Limitations of lower quality studies included measuring but not reporting a subgroup analysis of age and/or deprivation, study design, limited description of the intervention and statistically underpowered results. Where available, relevant statistical values are presented in Table 2.

Nine studies used a combination of nicotine replacement therapy (NRT) and behavioural counselling (28-30, 32-37). One study used only NRT (31) and one used behavioural counselling without NRT (38). Results are presented in relation to intervention elements including the behavioural content, setting, intervention provider and mode and duration of delivery. A sub-heading under each intervention element presents data on smoking outcomes. Further study characteristics and findings are also presented in Table 2.

Table 2: Study Characteristics

| Study (Country)                          | Study design                | Sample                                                                                                                                                                                                                                                          | Intervention                                                                                                                                                                                | Measure of smoking abstinence     | Summary of findings                                                                                                                                                                                                                                                                                                                                                                           | Quality appraisal |
|------------------------------------------|-----------------------------|-----------------------------------------------------------------------------------------------------------------------------------------------------------------------------------------------------------------------------------------------------------------|---------------------------------------------------------------------------------------------------------------------------------------------------------------------------------------------|-----------------------------------|-----------------------------------------------------------------------------------------------------------------------------------------------------------------------------------------------------------------------------------------------------------------------------------------------------------------------------------------------------------------------------------------------|-------------------|
| Bade et al (2016) (Germany)              | Randomised controlled trial | 4052 participants from the German lung cancer screening intervention trial. 1535 (62%) male, 950 (38%) female. 1737 (70%) aged 50-59 years, 748 (30%) 60-69 years old. 1823 (73%) 'low' in education and 1594 (65%) 'low' in vocational training.               | Low-dose multislice CT (MSCT) and smoking cessation counselling (SCC) delivered by a psychologist in a radiology department. 20 minute counselling followed by at least one telephone call. | Self-report at 12 and 24 months   | Proportion of current smokers decreased among screenees (3.4%, $p < 0.0001$ ), controls (4.5%, $p < 0.0001$ ), and entire cohort (4.0%, $p < 0.0001$ ). The magnitude of decrease in smoking rate was larger in SSC participants (screenees 9.6%, $p < 0.0001$ ; controls 10.4%, $p < 0.0001$ ) compared to non-SSC attendants (screenees 0.8%, $p = 0.30$ ; controls 1.6%, $p = 0.03$ ).     | High              |
| Bauld et al (2009) (United Kingdom)      | Observational study         | 1785 pharmacy service users. 762 (56%) in the Starting Fresh (SF) group and 311 (76%) in the Smoking Concerns (SC) group were aged 41 years or older. 796 (58%) from SF were in the lowest deprivation quintile, 187 (46%) from SC were in the lowest quintile. | Behavioural support delivered by a trained adviser in a group-based community setting (SC) or individually in a pharmacy setting (SF), with access to nicotine replacement therapy.         | Biochemical validation at 1 month | 146 (36%) quit rate in SC versus 255 (19%) in SF ( $OR^1 = 1.98$ ; 95% CI 1.90 to 3.08). SC and SF deprived smokers had lower cessation rates ( $OR = 0.677$ ; $p = 0.015$ ). Cessation rate for pharmacy clients increased sharply with age from 13.4% for age 16-40 to 30.7% for age 61 and over ( $P < 0.00$ ). The increase for group clients statistically insignificant ( $P = 0.25$ ). | Medium            |
| Celestin Jr et al (2016) (United States) | Retrospective cohort study  | 8, 549 tobacco users in Louisiana's public hospital facility. 1531 (68%) in the intervention group were aged 45 years and over. 1,196 (57%) were from the lowest 'financial class'.                                                                             | Standard care plus group behavioural counselling in a hospital classroom. 4 one-hour sessions, once a week within a 1-month period.                                                         | Self-report at 12 months          | Intervention participants had greater odds of sustained abstinence than non-attendees ( $aOR^2 = 1.52$ ; 95% CI 1.21 to 1.90). Higher 12-month quit rate in patients over age 60 (22%) compared to 18-30 year olds (11%) ( $aOR^3 = 2.36$ ; 95% CI <sup>3</sup> 1.58 to 3.52).                                                                                                                | Low               |

<sup>1</sup> Odds ratio<sup>2</sup> Adjusted odds ratio<sup>3</sup> Confidence interval

|    |                     |               |                                       |                               |                    |                                                   |        |
|----|---------------------|---------------|---------------------------------------|-------------------------------|--------------------|---------------------------------------------------|--------|
| 1  |                     |               |                                       |                               |                    |                                                   |        |
| 2  |                     |               |                                       |                               |                    |                                                   |        |
| 3  | Copeland et al      | Observational | 101 patients from a disadvantaged     | GP consultation and           | Self-report at 3   | Post intervention 35 (35%) smoked the             | Low    |
| 4  | (2005)              | cohort study  | area of Edinburgh                     | subsequent prescription of    | months             | same, 46 (45%) were smoking less and 20           |        |
| 5  | (United Kingdom)    |               |                                       | nicotine replacement          |                    | (20%) had stopped smoking.                        |        |
| 6  |                     |               |                                       | therapy                       |                    | Older participants were more likely to have       |        |
| 7  |                     |               |                                       |                               |                    | stopped or to be smoking less ( $p < 0.00$ ).     |        |
| 8  |                     |               |                                       |                               |                    |                                                   |        |
| 9  | Lasser et al (2017) | Prospective,  | 352 participants randomised (177      | Patient navigation and        | Biochemical        | 21 (12%) intervention participants quit           | Medium |
| 10 | (United States)     | randomised    | intervention, 175 control).           | financial incentive           | validation at 12   | smoking compared to 4 (2%) control                |        |
| 11 |                     | trial         | 197 (56%) aged 51-74.                 | (intervention) versus         | months             | participants (OR=5.8, 95% CI 1.9 to 17.1,         |        |
| 12 |                     |               | 193 (55%) with a household yearly     | enhanced traditional care     |                    | $p < 0.00$ ).                                     |        |
| 13 |                     |               | income $< \$20,000$ .                 | (control). Intervention       |                    | In the intervention arm ( $n=177$ ), participants |        |
| 14 |                     |               |                                       | received 4 hours of support   |                    | aged 51-74 had higher quit rates compared         |        |
| 15 |                     |               |                                       | over 6 months. Delivered      |                    | to those aged 21-50 (19 [19.8%] vs 2 [2.0%];      |        |
| 16 |                     |               |                                       | by patient navigators over    |                    | $p < 0.00$ ). Household yearly income of          |        |
| 17 |                     |               |                                       | the phone or in-person.       |                    | $< \$20,000$ had higher quit rates compared to    |        |
| 18 |                     |               |                                       |                               |                    | $> \$20,000$ (15 [15.5%] vs 4 [8%]; $p = 0.00$ )  |        |
| 19 |                     |               |                                       |                               |                    |                                                   |        |
| 20 | Neumann et al       | Observational | 20,588 disadvantaged patients (low    | 6-week manualised Gold        | Self-reported      | 34% of responders reported 6 months of            | Medium |
| 21 | (2013)              | prospective   | level of education and receiving      | Standard Programme in         | continuous         | continuous abstinence.                            |        |
| 22 | (Denmark)           | cohort study  | unemployment benefits).               | hospitals and primary care    | abstinence at 6    | Continuous abstinence was significantly           |        |
| 23 |                     |               | 15,244 (74%) aged 40 years or over.   | facilities (e.g. pharmacies). | months             | lower in those with less education (30%)          |        |
| 24 |                     |               |                                       | Delivered in 5 meetings       |                    | versus more education (35%) ( $p < 0.00$ ).       |        |
| 25 |                     |               |                                       | over 6 weeks by a certified   |                    | For participants with a lower educational         |        |
| 26 |                     |               |                                       | staff member. Both group      |                    | level, individual counselling was a predictor     |        |
| 27 |                     |               |                                       | and individual counselling    |                    | of success in smoking cessation (OR=1.31,         |        |
| 28 |                     |               |                                       | was offered.                  |                    | 95% CI 1.05 to 1.63).                             |        |
| 29 |                     |               |                                       |                               |                    |                                                   |        |
| 30 | Ormston et al       | Mixed-        | 2042 smokers living in deprived areas | Financial incentive and       | Biochemical        | Intervention was responsible for 36% of all       | Medium |
| 31 | (2015)              | methods,      | of Dundee. 70 (54%) aged 45 years and | behavioural support based     | validation at 1, 3 | quit attempts in the three most deprived          |        |
| 32 | (United Kingdom)    | quasi-        | over. 119 (92%) from the two most     | on Scottish national          | and 12 months      | areas. 12 month quit rate (9.3%) was              |        |
| 33 |                     | experimental  | deprived areas.                       | guidelines, with              |                    | significantly higher than other Scottish stop     |        |
| 34 |                     | study         |                                       | pharmacotherapy (Quit4u       |                    | smoking services (6.5%) (relative difference      |        |
| 35 |                     |               |                                       | Scheme) delivered in group    |                    | 1.443, 95% CI 1.132 to 1.839, $p = 0.00$ ).       |        |
| 36 |                     |               |                                       | (practice nurses) and one-    |                    |                                                   |        |
| 37 |                     |               |                                       | to-one settings (community    |                    |                                                   |        |
| 38 |                     |               |                                       | pharmacists) for up to 12     |                    |                                                   |        |
| 39 |                     |               |                                       | weeks.                        |                    |                                                   |        |
| 40 |                     |               |                                       |                               |                    |                                                   |        |

1  
2  
3  
4  
5  
6  
7  
8  
9  
10  
11  
12  
13  
14  
15  
16  
17  
18  
19  
20  
21  
22  
23  
24  
25  
26  
27  
28  
29  
30  
31  
32  
33  
34  
35  
36  
37  
38  
39  
40  
41  
42  
43  
44  
45  
46

|                                               |                             |                                                                                                                                                                                                                                                  |                                                                                                                                                                                                                                                                                                                                                                                |                                                          |                                                                                                                                                                                                                                                                                                                                                                                                                                                                                                                                                                                         |        |
|-----------------------------------------------|-----------------------------|--------------------------------------------------------------------------------------------------------------------------------------------------------------------------------------------------------------------------------------------------|--------------------------------------------------------------------------------------------------------------------------------------------------------------------------------------------------------------------------------------------------------------------------------------------------------------------------------------------------------------------------------|----------------------------------------------------------|-----------------------------------------------------------------------------------------------------------------------------------------------------------------------------------------------------------------------------------------------------------------------------------------------------------------------------------------------------------------------------------------------------------------------------------------------------------------------------------------------------------------------------------------------------------------------------------------|--------|
| Park et al (2015)<br>(United States)          | Matched case control study  | 3336 National Lung Screening Trial participants. Aged 55 to 74 years old. No report of deprivation at baseline. Subgroup analysis performed for education.                                                                                       | Brief SCI delivered by a primary care clinician using the 5As.                                                                                                                                                                                                                                                                                                                 | Self-report at 12 months                                 | Assist was associated with a 40% increase in quitting (OR=1.40, 95% CI 1.21 to 1.63). Arrange was associated with a 46% increase in quitting (OR=1.46, 95% CI 1.19 to 1.79). Higher educational level was significantly associated with quitting after delivery of each of the 5As (ORs=1.14 to 1.26 for college degree or higher versus high school education).                                                                                                                                                                                                                        | Medium |
| Sheffer et al (2013)<br>(United States)       | Observational study         | 7267 smokers in telephone treatment participants: 30% aged >50 years, 35% aged 36-49 years. In-person participants: 38% aged >50 years, 38% aged 36-49 years. No report of deprivation at baseline. Subgroup analysis performed for deprivation. | Behavioural counselling-manual driven sessions delivered weekly in-person (healthcare settings) or over the telephone, with free nicotine patches for 6 weeks. Delivered by a health care provider trained in brief evidence-based tobacco dependence interventions.                                                                                                           | Self-report at 3 and 6 months                            | Abstinence rates were higher for in-person counselling (37.7%) versus telephone counselling (30.8%) (p<0.00). No significant difference at 3 months (p=0.73) and 6 months (p=0.27) between in-person (28.2%; 27.2%) and telephone (28.7%; 28.7%). The highest socioeconomic (SES) group was more likely to be abstinent with telephone treatment (SES3: P =0.03; OR = 1.45; 95% CI = 1.04, 2.01). No significant differences between the in-person and telephone for the two lower SES groups (SES1: OR=1.02, 95% CI 0.88 to 1.18, p=0.82; SES2: OR=0.91, 95% CI 0.72 to 1.15, p=0.41). | Low    |
| Sheikhhattari et al (2016)<br>(United States) | Randomised controlled trial | 409 (52%) were aged 48 years and over. Targeted communities where more than 40% of the households earn less than \$25,000. 531 (72%) were unemployed.                                                                                            | Peer-led community based intervention over three phases. Phase 1 (n=404) – the American Cancer Society’s 4-week Fresh Start smoking cessation curriculum expanded to 12 weeks at health centres and delivered by a doctor, nurse or social worker. Phase 2 (n=398) and Phase 3 (n=163) – tailored group counselling in community venues, delivered by trained peer motivators. | Self-report and biochemical validation at 3 and 6 months | Delivery of services in community settings was a predictor of quitting (OR=2.6, 95% CI 1.7 to 4.2). Smoking cessation increased from 38 (9.4%) in Phase 1 to 84 (21.1%) in Phase 2, and 49 (30.1%) in Phase 3. Phases 2 and 3 were associated with higher odds compared to Phase 1, with adjusted ORs of 2.1 (95% CI 1.3 to 3.5) and 3.7 (95%CI 2.1 to 6.3) respectively. Older age (>48 years versus <48 years) was associated with higher quit rate (13.3% vs 19.1%, p=0.028).                                                                                                        | High   |

|    |                      |               |                                      |                              |                  |                                            |
|----|----------------------|---------------|--------------------------------------|------------------------------|------------------|--------------------------------------------|
| 1  |                      |               |                                      |                              |                  |                                            |
| 2  |                      |               |                                      |                              |                  |                                            |
| 3  |                      |               |                                      |                              |                  |                                            |
| 4  |                      |               |                                      |                              |                  |                                            |
| 5  | Stewart et al (2010) | Pilot         | 44 women, aged 25-69, living on low  | Facilitated group support    | Self-report at 3 | The mean number of cigarettes smoked daily |
| 6  | (Canada)             | evaluation of | income in urban areas of Western     | supplemented with one-to-    | months           | decreased from pre to post-test (p=0.00).  |
| 7  |                      | a before and  | Canada.                              | one support from a mentor.   |                  | Among women completing all data collection |
| 8  |                      | after study   | 23 (52%) aged 40 years or older.     | Once a week, duration of     |                  | (n=22), the mean number of cigarettes      |
| 9  |                      |               | 18 (39%) participants unemployed, 26 | 12 weeks minimum. Groups     |                  | consumed daily decreased from 0.95 pre-    |
| 10 |                      |               | (62%) on welfare/income support.     | facilitated by professionals |                  | intervention to 0.32 immediately after the |
| 11 |                      |               |                                      | and former smokers with      |                  | intervention, then increased to 0.64 at 3  |
| 12 |                      |               |                                      | the option of one-to-one     |                  | months post-intervention. Four women       |
| 13 |                      |               |                                      | from peers in community      |                  | reported sustained cessation.              |
| 14 |                      |               |                                      | centres.                     |                  |                                            |
| 15 |                      |               |                                      |                              |                  |                                            |
| 16 |                      |               |                                      |                              |                  |                                            |
| 17 |                      |               |                                      |                              |                  |                                            |
| 18 |                      |               |                                      |                              |                  |                                            |
| 19 |                      |               |                                      |                              |                  |                                            |
| 20 |                      |               |                                      |                              |                  |                                            |
| 21 |                      |               |                                      |                              |                  |                                            |
| 22 |                      |               |                                      |                              |                  |                                            |
| 23 |                      |               |                                      |                              |                  |                                            |
| 24 |                      |               |                                      |                              |                  |                                            |
| 25 |                      |               |                                      |                              |                  |                                            |
| 26 |                      |               |                                      |                              |                  |                                            |
| 27 |                      |               |                                      |                              |                  |                                            |
| 28 |                      |               |                                      |                              |                  |                                            |
| 29 |                      |               |                                      |                              |                  |                                            |
| 30 |                      |               |                                      |                              |                  |                                            |
| 31 |                      |               |                                      |                              |                  |                                            |
| 32 |                      |               |                                      |                              |                  |                                            |
| 33 |                      |               |                                      |                              |                  |                                            |
| 34 |                      |               |                                      |                              |                  |                                            |
| 35 |                      |               |                                      |                              |                  |                                            |
| 36 |                      |               |                                      |                              |                  |                                            |
| 37 |                      |               |                                      |                              |                  |                                            |
| 38 |                      |               |                                      |                              |                  |                                            |
| 39 |                      |               |                                      |                              |                  |                                            |
| 40 |                      |               |                                      |                              |                  |                                            |
| 41 |                      |               |                                      |                              |                  |                                            |
| 42 |                      |               |                                      |                              |                  |                                            |
| 43 |                      |               |                                      |                              |                  |                                            |
| 44 |                      |               |                                      |                              |                  |                                            |
| 45 |                      |               |                                      |                              |                  |                                            |
| 46 |                      |               |                                      |                              |                  |                                            |

For peer review only

### **Behavioural intervention content**

Ten studies focused on meeting the individual participant's needs using education and motivational techniques including support and encouragement (28-30, 32-38). In all ten studies, the interventions involved using motivational techniques with varying levels of intensity (Table 2).

Nine studies used interventions that were of higher intensity (28-30, 32, 33, 35-38). These studies involved incorporating specific action planning by quit motivation (28), using a combination of manual-based teaching and patient education sessions including relapse prevention modules (36), motivational interviewing techniques (32), discussions on the benefits and costs of smoking versus cessation (33), empowering strategies to enhance self-efficacy (38) and cognitive behavioural content (35).

Three studies used financial incentives as part of their intervention (32, 36, 37). A randomised control trial conducted by Lasser et al (32) offered participants \$750 for abstinence at 12 month follow-up. This element of the intervention was combined with patient navigation in which trained navigators identified and discussed salient social contextual factors using motivational interviewing. Ormston et al (37) combined behavioural support with financial incentives to participants upon biochemically verified cessation.

### **Outcomes**

One study found that the 'assist' and 'arrange follow-up' elements of a brief SCI based on the 5As (ask, advise, assess, assist and arrange follow-up) alongside lung cancer screening significantly increased the odds of quitting (34). Results showed that the decrease in smoking rate was larger for those who received behavioural support compared to those that did not.

Findings from this study demonstrated that abstinence was lower in those with a lower

1  
2  
3 educational level and individual counselling was a predictor of cessation for those with a  
4  
5 lower educational level (Table 2).  
6  
7

8 Interventions using financial incentives found that older participants and those with the  
9  
10 lowest income had higher quit rates (Table 2); however, it is difficult to infer findings from  
11  
12 this trial as it was underpowered with a small sample size at follow-up (Table 2). Ormston et  
13  
14 al (37) found that quit rates for the intervention group were significantly higher compared to  
15  
16 other stop smoking services (Table 2). Seventy-one percent of participants reported that the  
17  
18 incentive component was 'very' or 'quite useful' in helping them quit, with participants  
19  
20 describing it as a 'bonus' or 'reward' to motivate them.  
21  
22  
23

24  
25 Stewart et al (38) reported smoking self-efficacy from qualitative data and found that  
26  
27 participants thought the education they gained increased their awareness of their smoking  
28  
29 habits, reasons why they are smoking and the importance of quitting. Participants also  
30  
31 reported an increase in the number of available support sources (e.g. parents, spouse and  
32  
33 friends) along with a significant increase in perceived social support (38).  
34  
35  
36

### 37 **Setting**

38  
39  
40 Two studies took place in a lung screening setting (28, 34) and used contrasting forms of  
41  
42 interventions. Park (34) offered a brief SCI delivered by a primary care clinician, whereas  
43  
44 Bade (28) used a more intensive intervention delivered by a psychologist who was trained in  
45  
46 tobacco treatment. The latter study was an RCT design with a large sample size and took  
47  
48 place in the radiology department before or after the participant's screening.  
49  
50  
51

52  
53 Five studies were delivered in a variety of easily accessible community settings including  
54  
55 community pharmacies (29, 33, 37) and community venues such as centres and churches (29,  
56  
57 36-38) (Table 2). Five studies took place at primary care facilities such as a medical/health  
58  
59  
60



1  
2  
3 centres (31, 32, 35) and hospitals (30, 33). One study delivered the intervention in both  
4  
5 community and primary care settings (33).  
6  
7

## 8 Outcomes

9  
10  
11 Stewart (38) used a community-based intervention that took place in an easily accessible  
12  
13 community centre, familiar to participants. Findings from this small-scale pilot study of  
14  
15 female smokers suggested that the amount of cigarettes smoked decreased post-intervention  
16  
17 (Table 2). Ormston et al (37) compared intervention delivery in community pharmacies and  
18  
19 cessation groups to other stop smoking services and demonstrated significantly higher quit  
20  
21 rates in deprived communities (Table 2).  
22  
23

24  
25  
26 Bauld et al (29) showed that specialist-led group-based services have higher quit rates  
27  
28 compared to one-to-one services that are provided by pharmacies. Cessation rates for  
29  
30 pharmacy clients increased with age, and more deprived smokers had lower smoking  
31  
32 cessation rates in both the pharmacy-led and one-to-one services (Table 2). Sheikhattari (36)  
33  
34 found higher quit rates for community-based intervention in comparison to clinic-based  
35  
36 delivered in phase 1 of the intervention (Table 2). Results from this study also found that old  
37  
38 age was associated with higher quit rates for participants. Older age in the case of this study  
39  
40 was defined as more than 48 years of age.  
41  
42  
43

## 44 Provider

45  
46  
47 Interventions were delivered by a range of providers (Table 2). Seven studies employed  
48  
49 healthcare professionals such as general practitioners, primary care practice nurses,  
50  
51 psychologists and pharmacists (28, 30, 31, 33-35, 38). Two studies employed trained peer  
52  
53 motivators to deliver their intervention. Sheikhattari (36) used peer motivators who were  
54  
55 former smokers to deliver the behavioural sessions. Peer motivators lived or worked in the  
56  
57 community and were trained in delivering the intervention.  
58  
59  
60

## Outcomes

Smoking abstinence outcomes varied according to SCI provider (Table 2). A small scale observational study by Copeland et al (31) examined the use of nicotine replacement therapy and a brief GP consultation. Results showed that older smokers were more likely to have stopped smoking (Table 2).

Sheikhattari et al (36) demonstrated that subsequent phases of the intervention delivered by trained peer facilitators were associated with higher odds of quitting compared to the first phase where intervention delivery was conducted by a doctor, nurse or social worker (Table 2). Lasser et al (32) used patient navigators who had completed 10 hours of training in motivational interviewing techniques and had experience of working in community settings. Findings demonstrated that older participants and those with a lower household yearly income had higher quit rates (Table 2).

Qualitative data from Stewart et al's study (38) involving a small sample of female participants demonstrated that participants felt peer facilitators helped to clarify their cessation efforts as they were able to share experiences and strategies and learn from each other.

## Mode and duration

Studies varied in the mode and duration of delivery of SCIs (Table 2). Seven studies examined both individual and group behavioural counselling sessions (29, 30, 32, 33, 35, 37, 38) (Table 2) and four studies used only one-to-one behavioural support (28, 31, 32, 34).

## Outcomes

Bauld et al (29) showed that participants accessing group-based services were almost twice as likely as those who used individual pharmacy-based support to have quit smoking at 4-weeks

1  
2  
3 (Table 2). Similarly, Celestin (30) showed that attendees of group behavioural counselling  
4  
5 had significantly higher long-term quit rates compared to non-attendees, however this study  
6  
7 was rated as lower in quality. Sheikhattari et al (36) used a six-week group-counselling  
8  
9 module followed by a six-week relapse prevention module. Higher odds of quitting were  
10  
11 associated with phases 2 and 3 of the intervention in which community-based group  
12  
13 counselling was delivered (Table 2).  
14  
15

16  
17 Lasser and colleagues (32) delivered their one-to-one behavioural support over 6 months  
18  
19 either in-person or over the telephone, with a goal of four hours per participant. Results  
20  
21 demonstrated that 12% from the intervention group had quit smoking in comparison to 4%  
22  
23 from the control (Table 2). Bade (28) also employed behavioural counselling in-person, with  
24  
25 at least one subsequent telephone call for those who had specified a quit date. Participants  
26  
27 were offered four telephone calls that lasted around 20 minutes in duration and findings  
28  
29 demonstrated a larger decrease in smoking for screening attendees compared to non-attendees  
30  
31 (Table 2).  
32  
33  
34

35  
36 Sheffer et al (35) delivered both telephone and in-person behavioural counselling. Smoking  
37  
38 abstinence rates were higher for in-person counselling and smokers of higher socioeconomic  
39  
40 status were more likely to have quit after having had telephone treatment compared to lower  
41  
42 socioeconomic smokers. Neumann et al (33) offered either group or individual counselling  
43  
44 and demonstrated that for those with a lower educational level, individual counselling was a  
45  
46 predictor of smoking cessation (Table 2)  
47  
48  
49

### 50 51 **Moderating variables**

52  
53  
54 Seven studies reported limited data on moderating variables (28-30, 32, 34-36). Three RCTs  
55  
56 demonstrated that participants who had a lower Fagerstrom score (36), who were in the  
57  
58  
59  
60

1  
2  
3 contemplation stage (32) and had reported high readiness to quit (28) at baseline were more  
4  
5 likely to have abstained from smoking post-intervention.  
6  
7

## 8 **DISCUSSION**

9  
10  
11 To our knowledge, the current systematic review was the first to explore the influence of  
12  
13 behavioural SCIs for a population at high-risk of developing lung cancer due to smoking and  
14  
15 sociodemographic factors (22). The findings indicate a clear lack of evidence from large-  
16  
17 scale trials of effectiveness in a lung screening context as well as a lack of data reporting  
18  
19 psychosocial moderators of cessation for older, deprived smokers. The majority of included  
20  
21 studies used a combination of pharmacotherapy and a form of behavioural counselling,  
22  
23 supporting previous evidence that a combined approach is the most effective for older,  
24  
25 deprived smokers (21). However, findings relating to the provider, mode, duration and setting  
26  
27 of behavioural counselling are encouraging. Behavioural counselling delivered in a  
28  
29 community setting and tailored to individual needs appeared to demonstrate a positive impact  
30  
31 on smoking cessation outcomes.  
32  
33  
34  
35

36  
37 Behavioural interventions identified in the current review used a range of approaches and  
38  
39 although none of the included studies explicitly described their intervention as "tailored",  
40  
41 many used a form of behavioural counselling that was implicitly flexible according to the  
42  
43 needs of the individuals. Interventions were implemented in locations that addressed barriers  
44  
45 to access, such as local community centres, and intervention content was driven by the  
46  
47 individual's psychological needs (29, 36-38). Previous research suggests that in order for  
48  
49 people to access stop smoking services, the appointments should be flexible and accessible  
50  
51 (39).  
52  
53

54  
55  
56 The optimal mode of intervention was unclear from the current review, with findings  
57  
58 suggesting varying success for both group and one-to-one behavioural support. However,  
59  
60

1  
2  
3 certain aspects of behavioural interventions such as incentives, the use of peer facilitators and  
4  
5 more intensive counselling show some promise for the target population. Smith et al (40)  
6  
7 found that although smokers from deprived backgrounds were more likely to access a  
8  
9 smoking cessation service, they were less likely to be successful in their quit attempt. Future  
10  
11 research should aim to understand the needs and preferences of these smokers and focus on  
12  
13 psychosocial mechanisms that can be targeted in more holistic level interventions.  
14  
15

16  
17 The eleven studies included in the review were heterogeneous in design, SCI modality,  
18  
19 sample size, intervention timing and measurement of smoking abstinence. Only three were  
20  
21 RCTs, of which one was underpowered (32), thus the effectiveness results across the studies  
22  
23 were modest. Chen and Wu (41) identified the need for controlled trials of SCIs for older  
24  
25 smoker, in order to better understand the most suitable form of intervention for this  
26  
27 population. Similarly to findings from Pineiro et al's review (42), the studies currently  
28  
29 presented did not consistently use biochemical verification of smoking cessation, with most  
30  
31 relying on self-reported smoking cessation (Table 2). Various design aspects of the included  
32  
33 studies, including the use of non-randomised methods, limited the extent to which firm  
34  
35 conclusions can be drawn about the effectiveness of behavioural SCIs for older, deprived  
36  
37 smokers. Only two studies included qualitative process evaluation data, therefore there was  
38  
39 limited ability to explore the reasons why certain intervention characteristics were more or  
40  
41 less likely to have a positive effect on smoking outcomes. Evidence suggests that smokers  
42  
43 from disadvantaged backgrounds have specific obstacles to quitting successfully (20) and  
44  
45 further mixed-methods research is warranted to understand why some forms of SCI support  
46  
47 are more able to mitigate these barriers.  
48  
49  
50  
51  
52

53  
54 We also acknowledge methodological limitations of the present systematic review. By  
55  
56 restricting the inclusion criteria for age and socioeconomic group, a number of potentially  
57  
58 relevant studies were excluded. For example, telephone-based counselling for smokers  
59  
60

1  
2  
3 undergoing lung cancer screening, involving messages about risks of smoking in the context  
4  
5 of LDCT scan results, can improve self-efficacy for quitting and the likelihood of a  
6  
7 successful quit attempt (43). However, our review highlights the current absence of robust  
8  
9 evidence regarding behavioural SCIs that are effective for the lung screening eligible  
10  
11 population of older deprived smokers.  
12  
13

## 14 15 **CONCLUSION**

16  
17  
18 The current systematic review demonstrates the potential for tailored, multimodal SCIs for  
19  
20 older, deprived smokers that can be embedded within disadvantaged communities. With the  
21  
22 prospect of lung cancer screening being implemented in the UK and Europe in the near  
23  
24 future, this research adds to the evidence base regarding promising SCIs for high-risk  
25  
26 disadvantaged populations who will benefit most from lung screening and integrated smoking  
27  
28 cessation support. However, rigorous, high quality research is needed in order to conclude  
29  
30 the overall effectiveness of SCIs for older, more deprived smokers.  
31  
32  
33  
34  
35  
36  
37  
38  
39  
40  
41  
42  
43  
44  
45  
46  
47  
48  
49  
50  
51  
52  
53  
54  
55  
56  
57  
58  
59  
60

## DECLARATION

### Competing Interests

The authors declare that they have no competing interests.

### Authors' contribution

Pamela Smith, Prof Kate Brain, Mala Mann, Prof Annmarie Nelson and Dr Graham Moore were responsible for the concept, overall design and conduct of the review. MM gave additional support and advice on methodology including the search strategy. PS was responsible for collection of data and manuscript preparation. Dr Ria Poole double-checked 20% of included abstracts and full-texts. RP, MM, AN, GM and KB reviewed the edited manuscript preparation. All authors were involved in the interpretation of the results and approved the final version of the manuscript. RP is funded by a Cancer Research UK Population Research Committee Post-Doctoral Fellowship. AN's and MM's posts are supported by Marie Curie core grant funding (grant reference: MCCCFCO-11-C).

### Acknowledgements

We would like to thank Dr Grace McCutchan for her support and guidance throughout the review process. This study was funded by School of Medicine, Cardiff University.

## References

1. World Health Organisation. Report on the Global Tobacco Epidemic 2008. Available from: [www.who.int/tobacco/mpower/en/](http://www.who.int/tobacco/mpower/en/).
2. Office for National Statistics, Adult smoking habits in the UK: 2017. 2018. Available from: <https://www.ons.gov.uk/peoplepopulationandcommunity/healthandsocialcare/healthandlifeexpectancies/bulletins/adultsmokinghabitsingreatbritain/2017>.
3. Office for National Statistics.: Adult smoking habits in Great Britain 2017. ; 2017 [December 2018]. Available from: <http://ash.org.uk/category/information-and-resources/fact-sheets/>.
4. Information Services Division (ISD). : NHS National Services Scotland; 2012 [November 2018]. Available from: <http://www.isdscotland.org/Health-Topics/Cancer/Publications/2012-04-24/2012-04-24-Cancer-Incidence-report.pdf?49042910338>.
5. Welsh Cancer Intelligence and Surveillance Unit: Public Health Wales; 2015.
6. Shack L, Jordan C, Thomson CS, Mak V, Moller H, Registries UKAoC. Variation in incidence of breast, lung and cervical cancer and malignant melanoma of skin by socioeconomic group in England. *BMC Cancer*. 2008;8:271.
7. Humphrey LL, Deffebach M, Pappas M, Baumann C, Artis K, Mitchell JP, et al. Screening for lung cancer with low-dose computed tomography: a systematic review to update the US Preventive services task force recommendation. *Ann Intern Med*. 2013;159(6):411-20.
8. Ashraf H, Tonnesen P, Holst Pedersen J, Dirksen A, Thorsen H, Dossing M. Effect of CT screening on smoking habits at 1-year follow-up in the Danish Lung Cancer Screening Trial (DLCST). *Thorax*. 2009;64(5):388-92.
9. Brain K, Carter B, Lifford KJ, Burke O, Devaraj A, Baldwin DR, et al. Impact of low-dose CT screening on smoking cessation among high-risk participants in the UK Lung Cancer Screening Trial. *Thorax*. 2017;72(10):912-8.
10. Tammemagi MC, Berg CD, Riley TL, Cunningham CR, Taylor KL. Impact of lung cancer screening results on smoking cessation. *J Natl Cancer Inst*. 2014;106(6):dju084.
11. van der Aalst CM, van den Bergh KA, Willemsen MC, de Koning HJ, van Klaveren RJ. Lung cancer screening and smoking abstinence: 2 year follow-up data from the Dutch-Belgian randomised controlled lung cancer screening trial. *Thorax*. 2010;65(7):600-5.
12. Bryant J, Bonevski B, Paul C. A survey of smoking prevalence and interest in quitting among social and community service organisation clients in Australia: a unique opportunity for reaching the disadvantaged. *BMC Public Health*. 2011;11:827.
13. Hiscock R, Judge K, Bauld L. Social inequalities in quitting smoking: what factors mediate the relationship between socioeconomic position and smoking cessation? *J Public Health (Oxf)*. 2011;33(1):39-47.
14. Vangeli E, West R. Sociodemographic differences in triggers to quit smoking: findings from a national survey. *Tob Control*. 2008;17(6):410-5.
15. Chandola T, Head J, Bartley M. Socio-demographic predictors of quitting smoking: how important are household factors? *Addiction*. 2004;99(6):770-7.
16. Mermelstein R, Cohen S, Lichtenstein E, Baer JS, Kamarck T. Social support and smoking cessation and maintenance. *J Consult Clin Psychol*. 1986;54(4):447-53.
17. Benowitz NL. Nicotine addiction. *N Engl J Med*. 2010;362(24):2295-303.
18. Fiore MC, Jaen CR, Baker TB, Bailey WC, Benowitz NL, Curry SJ, et al. Treating tobacco use and dependence: 2008 update US Public Health Service Clinical Practice Guideline executive summary. *Respiratory Care*. 2008;53(9):1217-22.
19. Bauld L, Judge K, Platt S. Assessing the impact of smoking cessation services on reducing health inequalities in England: observational study. *Tob Control*. 2007;16(6):400-4.
20. Hiscock R, Bauld L, Amos A, Fidler JA, Munafò M. Socioeconomic status and smoking: a review. *Ann N Y Acad Sci*. 2012;1248:107-23.



- 1
- 2
- 3
- 4 21. Bauld L, Bell K, McCullough L, Richardson L, Greaves L. The effectiveness of NHS smoking
- 5 cessation services: a systematic review. *J Public Health (Oxf)*. 2010;32(1):71-82.
- 6 22. Iaccarino JM, Duran C, Slatore CG, Wiener RS, Kathuria H. Combining smoking cessation
- 7 interventions with LDCT lung cancer screening: A systematic review. *Prev Med*. 2019;121:24-32.
- 8 23. Moher D, Liberati A, Tetzlaff J, Altman DG, Group P. Preferred reporting items for systematic
- 9 reviews and meta-analyses: the PRISMA statement. *J Clin Epidemiol*. 2009;62(10):1006-12.
- 10 24. The World Bank. Available from: <https://data.worldbank.org/income-level/high-income>.
- 11 25. Oudkerk M, Devaraj A, Vliegenthart R, Henzler T, Prosch H, P Heussel C, et al. European
- 12 position statement on lung cancer screening2017. e754-e66 p.
- 13 26. Popay JR, H. M.; Sowden, A.; Petticrew, M.; Arai, L.; Rodgers, M.; Britten, N. . Guidance on
- 14 the conduct of narrative synthesis in sytematic reviews: Institute for Health Research; 2006.
- 15 27. Singh J. Critical Appraisal Skills Programme. CASP Appraisal Tools2013. 76 p.
- 16 28. Bade M, Bahr V, Brandt U, Eigentopf A, Bruchert T, Gross ML, et al. Effect of smoking
- 17 cessation counseling within a randomised study on early detection of lung cancer in Germany.
- 18 2016:959-68, 2016 May.
- 19 29. Bauld L, Chesterman J, Ferguson J, Judge K. A comparison of the effectiveness of group-
- 20 based and pharmacy-led smoking cessation treatment in Glasgow. 2009:308-16, 2009 Feb.
- 21 30. Celestin MD, Tseng TS, Moody-Thomas S, Jones-Winn K, Hayes C, Guillory D, et al.
- 22 Effectiveness of group behavioral counseling on long-term quit rates in primary health care.
- 23 *Translational Cancer Research*. 2016;5(Supplement5):972-82.
- 24 31. Copeland L, Robertson R, Elton R. What happens when GPs proactively prescribe NRT
- 25 patches in a disadvantaged community. *Scottish Medical Journal*. 2005:64-8, 2005 May.
- 26 32. Lasser KE, Quintiliani LM, Truong V, Xuan Z, Murillo J, Jean C, et al. Effect of Patient
- 27 Navigation and Financial Incentives on Smoking Cessation Among Primary Care Patients at an Urban
- 28 Safety-Net Hospital: A Randomized Clinical Trial. *JAMA Internal Medicine*. 2017:1798-807, 2017 Dec
- 29 01.
- 30 33. Neumann T, Rasmussen M, Ghith N, Heitmann BL, Tonnesen H. The Gold Standard
- 31 Programme: smoking cessation interventions for disadvantaged smokers are effective in a real-life
- 32 setting. *Int J Environ Res Public Health*. 2013:e9, 2013 Nov.
- 33 34. Park ER, Gareen IF, Japuntich S, Lennes I, Hyland K, De Mello S, et al. Primary care provider-
- 34 delivered smoking cessation interventions and smoking cessation among participants in the national
- 35 lung screening trial. *JAMA Internal Medicine*. 2015;175(9):1509-16.
- 36 35. Sheffer C, Stitzer M, Landes R, Brackman SL, Munn T. In-Person and Telephone Treatment of
- 37 Tobacco Dependence: A Comparison of Treatment Outcomes and Participant Characteristics.
- 38 *American Journal of Public Health*. 2013;103(8):E74-E82.
- 39 36. Sheikhattari P, Apata J, Kamangar F, Schutzman C, O'Keefe A, Buccheri J, et al. Examining
- 40 Smoking Cessation in a Community-Based Versus Clinic-Based Intervention Using Community-Based
- 41 Participatory Research. 2016:1146-52, 2016 Dec.
- 42 37. Ormston R, van der Pol M, Ludbrook A, McConville S, Amos A. quit4u: the effectiveness of
- 43 combining behavioural support, pharmacotherapy and financial incentives to support smoking
- 44 cessation. 2015:121-33, 2015 Feb.
- 45 38. Stewart MJ, Kushner KE, Greaves L, Letourneau N, Spitzer D, Boscoe M. Impacts of a support
- 46 intervention for low-income women who smoke. 2010:1901-9, 2010 Dec.
- 47 39. Venn A, Dickinson A, Murray R, Jones L, Li J, Parrott S, et al. Effectiveness of a mobile, drop-
- 48 in stop smoking service in reaching and supporting disadvantaged UK smokers to quit. *Tob Control*.
- 49 2016;25(1):33-8.
- 50 40. Smith CH, S; and Amos, A. Stop Smoking Inequalities: A systematic review of socioeconomic
- 51 inequalities in experiences of smoking cessation interventions in the UK. *Cancer Research UK*. 2018.
- 52 41. Chen D, Wu LT. Smoking cessation interventions for adults aged 50 or older: A systematic
- 53 review and meta-analysis. *Drug Alcohol Depend*. 2015;154:14-24.
- 54
- 55
- 56
- 57
- 58
- 59
- 60

- 1  
2  
3 42. Pineiro B, Simmons VN, Palmer AM, Correa JB, Brandon TH. Smoking cessation interventions  
4 within the context of Low-Dose Computed Tomography lung cancer screening: A systematic review.  
5 Lung Cancer. 2016;98:91-8.  
6  
7 43. Zeliadt SB, Greene PA, Krebs P, Klein DE, Feemster LC, Au DH, et al. A Proactive Telephone-  
8 Delivered Risk Communication Intervention for Smokers Participating in Lung Cancer Screening: A  
9 Pilot Feasibility Trial. Journal of Smoking Cessation. 2018;13(3):137-44.  
10  
11  
12  
13  
14  
15  
16  
17  
18  
19  
20  
21  
22  
23  
24  
25  
26  
27  
28  
29  
30  
31  
32  
33  
34  
35  
36  
37  
38  
39  
40  
41  
42  
43  
44  
45  
46  
47  
48  
49  
50  
51  
52  
53  
54  
55  
56  
57  
58  
59  
60

For peer review only

Figure 1: PRISMA Flow Diagram

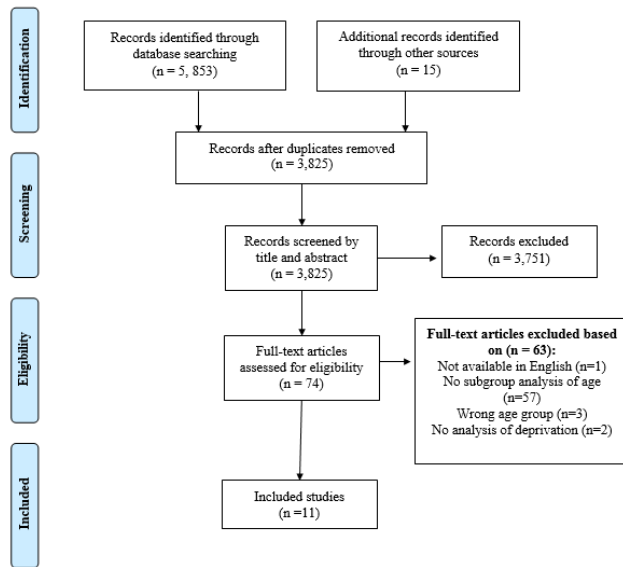

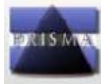

# PRISMA 2009 checklist

| Section/topic                      | #  | Checklist item                                                                                                                                                                                                                                                                                              | Reported on page # |
|------------------------------------|----|-------------------------------------------------------------------------------------------------------------------------------------------------------------------------------------------------------------------------------------------------------------------------------------------------------------|--------------------|
| <b>TITLE</b>                       |    |                                                                                                                                                                                                                                                                                                             |                    |
| Title                              | 1  | Identify the report as a systematic review, meta-analysis, or both.                                                                                                                                                                                                                                         | 1                  |
| <b>ABSTRACT</b>                    |    |                                                                                                                                                                                                                                                                                                             |                    |
| Structured summary                 | 2  | Provide a structured summary including, as applicable: background; objectives; data sources; study eligibility criteria, participants, and interventions; study appraisal and synthesis methods; results; limitations; conclusions and implications of key findings; systematic review registration number. | 2                  |
| <b>INTRODUCTION</b>                |    |                                                                                                                                                                                                                                                                                                             |                    |
| Rationale                          | 3  | Describe the rationale for the review in the context of what is already known.                                                                                                                                                                                                                              | 3,4                |
| Objectives                         | 4  | Provide an explicit statement of questions being addressed with reference to participants, interventions, comparisons, outcomes, and study design (PICOS).                                                                                                                                                  | 3,4                |
| <b>METHODS</b>                     |    |                                                                                                                                                                                                                                                                                                             |                    |
| Protocol and registration          | 5  | Indicate if a review protocol exists, if and where it can be accessed (e.g., Web address), and, if available, provide registration information including registration number.                                                                                                                               | 5                  |
| Eligibility criteria               | 6  | Specify study characteristics (e.g., PICOS, length of follow-up) and report characteristics (e.g., years considered, language, publication status) used as criteria for eligibility, giving rationale.                                                                                                      | 6                  |
| Information sources                | 7  | Describe all information sources (e.g., databases with dates of coverage, contact with study authors to identify additional studies) in the search and date last searched.                                                                                                                                  | 6                  |
| Search                             | 8  | Present full electronic search strategy for at least one database, including any limits used, such that it could be repeated.                                                                                                                                                                               |                    |
| Study selection                    | 9  | State the process for selecting studies (i.e., screening, eligibility, included in systematic review, and, if applicable, included in the meta-analysis).                                                                                                                                                   | 6,7                |
| Data collection process            | 10 | Describe method of data extraction from reports (e.g., piloted forms, independently, in duplicate) and any processes for obtaining and confirming data from investigators.                                                                                                                                  | 6                  |
| Data items                         | 11 | List and define all variables for which data were sought (e.g., PICOS, funding sources) and any assumptions and simplifications made.                                                                                                                                                                       | 6                  |
| Risk of bias in individual studies | 12 | Describe methods used for assessing risk of bias of individual studies (including specification of whether this was done at the study or outcome level), and how this information is to be used in any data synthesis.                                                                                      | 7                  |
| Summary measures                   | 13 | State the principal summary measures (e.g., risk ratio, difference in means).                                                                                                                                                                                                                               | n/a                |
| Synthesis of results               | 14 | Describe the methods of handling data and combining results of studies, if done, including measures of consistency (e.g., $I^2$ ) for each meta-analysis.                                                                                                                                                   | n/a                |

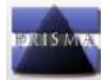

# PRISMA 2009 checklist

1  
2  
3  
4  
5  
6  
7  
8  
9  
10  
11  
12  
13  
14  
15  
16  
17  
18  
19  
20  
21  
22  
23  
24  
25  
26  
27  
28  
29  
30  
31  
32  
33  
34  
35  
36  
37  
38  
39

| Section/topic                 | #  | Checklist item                                                                                                                                                                                           | Reported on page # |
|-------------------------------|----|----------------------------------------------------------------------------------------------------------------------------------------------------------------------------------------------------------|--------------------|
| Risk of bias across studies   | 15 | Specify any assessment of risk of bias that may affect the cumulative evidence (e.g., publication bias, selective reporting within studies).                                                             | 7                  |
| Additional analyses           | 16 | Describe methods of additional analyses (e.g., sensitivity or subgroup analyses, meta-regression), if done, indicating which were pre-specified.                                                         | n/a                |
| <b>RESULTS</b>                |    |                                                                                                                                                                                                          |                    |
| Study selection               | 17 | Give numbers of studies screened, assessed for eligibility, and included in the review, with reasons for exclusions at each stage, ideally with a flow diagram.                                          | Supp. File, 8      |
| Study characteristics         | 18 | For each study, present characteristics for which data were extracted (e.g., study size, PICOS, follow-up period) and provide the citations.                                                             | 13-18              |
| Risk of bias within studies   | 19 | Present data on risk of bias of each study and, if available, any outcome level assessment (see item 12).                                                                                                | 13-18              |
| Results of individual studies | 20 | For all outcomes considered (benefits or harms), present, for each study: (a) simple summary data for each intervention group (b) effect estimates and confidence intervals, ideally with a forest plot. | 9-12               |
| Synthesis of results          | 21 | Present results of each meta-analysis done, including confidence intervals and measures of consistency.                                                                                                  | n/a                |
| Risk of bias across studies   | 22 | Present results of any assessment of risk of bias across studies (see Item 15).                                                                                                                          | n/a                |
| Additional analysis           | 23 | Give results of additional analyses, if done (e.g., sensitivity or subgroup analyses, meta-regression [see Item 16]).                                                                                    | n/a                |
| <b>DISCUSSION</b>             |    |                                                                                                                                                                                                          |                    |
| Summary of evidence           | 24 | Summarize the main findings including the strength of evidence for each main outcome; consider their relevance to key groups (e.g., healthcare providers, users, and policy makers).                     | 18-20              |
| Limitations                   | 25 | Discuss limitations at study and outcome level (e.g., risk of bias), and at review-level (e.g., incomplete retrieval of identified research, reporting bias).                                            | 18-20              |
| Conclusions                   | 26 | Provide a general interpretation of the results in the context of other evidence, and implications for future research.                                                                                  | 20                 |
| <b>FUNDING</b>                |    |                                                                                                                                                                                                          |                    |
| Funding                       | 27 | Describe sources of funding for the systematic review and other support (e.g., supply of data); role of funders for the systematic review.                                                               | 21                 |

40 From: Moher D, Liberati A, Tetzlaff J, Altman DG, The PRISMA Group (2009). Preferred Reporting Items for Systematic Reviews and Meta-Analyses: The PRISMA Statement. PLoS Med 6(6): e1000097.  
41 doi:10.1371/journal.pmed1000097

42 For more information, visit: [www.prisma-statement.org](http://www.prisma-statement.org).

45  
46  
47

# BMJ Open

## Systematic review of behavioural smoking cessation interventions for older smokers from deprived backgrounds

|                                 |                                                                                                                                                                                                                                                                                                                                                                                                                       |
|---------------------------------|-----------------------------------------------------------------------------------------------------------------------------------------------------------------------------------------------------------------------------------------------------------------------------------------------------------------------------------------------------------------------------------------------------------------------|
| Journal:                        | <i>BMJ Open</i>                                                                                                                                                                                                                                                                                                                                                                                                       |
| Manuscript ID                   | bmjopen-2019-032727.R1                                                                                                                                                                                                                                                                                                                                                                                                |
| Article Type:                   | Original research                                                                                                                                                                                                                                                                                                                                                                                                     |
| Date Submitted by the Author:   | 10-Sep-2019                                                                                                                                                                                                                                                                                                                                                                                                           |
| Complete List of Authors:       | Smith, Pamela; Cardiff University, Division of Population Medicine<br>Poole, Ria; Cardiff University, Division of Population Medicine<br>Mann, Mala; Cardiff University, Specialist Unit for Review Evidence<br>Nelson, Annmarie; Cardiff University, Marie Curie Research Centre<br>Moore, Graham; Cardiff University, School of Social Sciences<br>Brain, Kate; Cardiff University, Division of Population Medicine |
| <b>Primary Subject Heading</b>: | Public health                                                                                                                                                                                                                                                                                                                                                                                                         |
| Secondary Subject Heading:      | Public health, Smoking and tobacco                                                                                                                                                                                                                                                                                                                                                                                    |
| Keywords:                       | SOCIAL MEDICINE, PUBLIC HEALTH, PREVENTIVE MEDICINE                                                                                                                                                                                                                                                                                                                                                                   |
|                                 |                                                                                                                                                                                                                                                                                                                                                                                                                       |

SCHOLARONE™  
Manuscripts

1  
2  
3 Systematic review of behavioural smoking cessation interventions for older smokers from  
4  
5  
6 deprived backgrounds  
7

8 Authors: Pamela Smith\*<sup>a</sup>, Ria Poole<sup>a</sup>, Mala Mann<sup>b</sup>, Annmarie Nelson<sup>c</sup>, Graham Moore<sup>d</sup>,  
9  
10  
11 Kate Brain<sup>a</sup>  
12

13  
14 \*corresponding author

15 [Smithp18@cardiff.ac.uk](mailto:Smithp18@cardiff.ac.uk)

16  
17 8<sup>th</sup> Floor, Neuadd Meirionnydd, Heath Park, CF14 4YS

18  
19 02920 687695  
20  
21  
22  
23

24 <sup>a</sup> Division of Population Medicine, Cardiff University, Heath Park, Cardiff, UK, CF14 4YS

25 <sup>b</sup> Cardiff University, Specialist Unit for Review Evidence, Cardiff, UK, CF14 4YS

26 <sup>c</sup> Cardiff University, Marie Curie Research Centre, Cardiff, UK, CF14 4YS

27 <sup>d</sup> Cardiff University, School of Social Sciences, 1-3 Museum Place, Cardiff, UK CF10 3BD  
28  
29  
30  
31  
32  
33  
34  
35  
36  
37  
38  
39  
40  
41  
42  
43  
44  
45  
46  
47  
48  
49  
50  
51  
52  
53  
54  
55  
56  
57  
58  
59  
60

## ABSTRACT

### Introduction

The associations between smoking prevalence, socioeconomic group and lung cancer outcomes are well established. There is currently limited evidence for how inequalities could be addressed through specific smoking cessation interventions (SCIs) for a lung cancer screening eligible population. This systematic review aims to identify the behavioural elements of SCIs used in older adults from low socioeconomic groups, and to examine their impact on smoking abstinence and psychosocial variables.

### Method

Systematic searches of Medline, EMBASE, PsychInfo and CINAHL up to November 2018 were conducted. Included studies examined the characteristics of SCIs and their impact on relevant outcomes including smoking abstinence, quit motivation, nicotine dependence, perceived social influence and quit determination. Included studies were restricted to socioeconomically deprived older adults who are at (or approaching) eligibility for lung cancer screening. Narrative data synthesis was conducted.

### Results

Eleven studies met the inclusion criteria. Methodological quality was variable, with most studies using self-reported smoking cessation and varying length of follow-up. There were limited data to identify the optimal form of behavioural SCI for the target population. Intense multimodal behavioural counselling that uses incentives and peer facilitators, delivered in a community setting and tailored to individual needs indicated a positive impact on smoking outcomes.

### Conclusion



1  
2  
3 Tailored, multimodal behavioural interventions embedded in local communities could  
4  
5 potentially support cessation among older, deprived smokers. Further high-quality research is  
6  
7 needed to understand the effectiveness of SCIs in the context of lung screening for the target  
8  
9 population.  
10  
11  
12

13 Keywords: Smoking, smoking cessation, older, deprived, lung cancer, lung cancer screening  
14  
15

#### 16 Article summary

17  
18

- 19 • There is a current gap in knowledge about the most suitable form of behavioural  
20 smoking cessation intervention (SCI) for older, deprived smokers who are most likely  
21 to be eligible for lung screening  
22  
23
- 24 • This systematic review suggests that tailored, multimodal behavioural SCIs could  
25 support smoking cessation for those most likely to be eligible for lung screening;  
26 however, the studies included in the review were heterogeneous in design, SCI  
27 modality, sample size, intervention timing and measurement of smoking abstinence  
28  
29
- 30 • There is a lack of rigorous, high quality research for the target population  
31  
32  
33  
34  
35  
36  
37  
38  
39  
40  
41  
42  
43  
44  
45  
46  
47  
48  
49  
50  
51  
52  
53  
54  
55  
56  
57  
58  
59  
60

## INTRODUCTION

Smoking is the leading global cause of death and disease (1) and data show that there are approximately 7.4 million adult cigarette smokers in the United Kingdom (2, 3). Twenty-six percent of smokers in the UK are aged 50 years or older (3); these individuals tend to have long standing smoking histories, are often from deprived communities and are a population that are likely to be eligible for future lung screening implementation. The associations between smoking prevalence, socioeconomic group and a range of chronic disease outcomes, including lung cancer outcomes are well established, with higher smoking rates and greater lung cancer incidence and mortality (4-6) among people living in deprived areas.

The US Preventive Services Task Force recommends annual low-dose computed tomography screening for those who are high-risk heavy smokers, including adults aged 55-80 years old, with a 30 pack-year history (7). LDCT lung cancer screening has the potential to prompt a smoking cessation attempt and evidence for integrated smoking cessation support is growing (8-11), with research demonstrating promising results for quit rates when using a combined approach of smoking cessation support in a lung screening setting (9).

Prior to implementing appropriate smoking cessation intervention (SCIs) in a lung screening context in the UK, it is important to understand the factors that influence cessation attempts in older, deprived smokers who may be eligible for lung cancer screening. Known barriers to smoking cessation in this population include higher nicotine dependence, less motivation to quit, more life stress, lack of social support and differences in perceptions of smoking (12-14). Smokers from a low socioeconomic background may find quitting more difficult due to lack of support from their family members or community with quit attempts (15), partly due to higher smoking prevalence and normalisation of smoking in their social networks (16).

1  
2  
3 Studies suggest that cessation attempts in older smokers are more likely to fail due to heavy  
4 nicotine dependence and insufficient motivating factors such as self-efficacy to quit (17, 18).  
5  
6  
7

8 Using pharmacotherapy with structured behavioural support to assist smoking cessation has  
9 shown promise with disadvantaged smokers (19, 20). Intensive SCIs involving tailored  
10 pharmacotherapy and behavioural counselling to increase self-efficacy are most effective for  
11 deprived smokers (21). However further research is needed to understand specific  
12 characteristics of behavioural SCIs, such as mode of delivery, setting, intensity and duration,  
13 that could be used for older, deprived smokers.  
14  
15  
16  
17  
18  
19  
20  
21  
22

23 A recent review by Iaccarino (22) attempted to identify the best approach for delivering SCIs  
24 in a lung cancer screening setting and concluded that the optimal strategy remains unclear.  
25

26 There is a need to identify gaps in the evidence surrounding the optimal models for integrated  
27 smoking cessation in a lung screening setting, focusing specifically on a disadvantaged lung  
28 screening eligible population, as well as gain a better understanding of what form of SCI may  
29 work best for this population in the UK.  
30  
31  
32  
33  
34  
35  
36

37 The aims of this systematic review were to identify the behavioural aspects of SCIs for older,  
38 deprived adults who are eligible (or approaching eligibility) for lung cancer screening, and to  
39 explore which elements of the interventions were most effective in reducing smoking  
40 abstinence and modifying psychosocial variables. The findings from the systematic review  
41 will contribute to further understanding of optimal SCIs for individuals who are a target  
42 population for lung cancer screening.  
43  
44  
45  
46  
47  
48  
49  
50

## 51 **METHODS**

52 The systematic review was registered on PROSPERO (CRD42018088956) and followed the  
53 PRISMA guidelines (23). Throughout all stages of the search, data extraction and quality  
54 appraisal, 20% of studies were double-checked for consistency by another member of the  
55  
56  
57  
58  
59  
60

team (RP). All discrepancies were resolved through discussion. Data duplication was managed by removing duplications using a reference management software package (EndNote X9), which were then manually checked.

### Search strategy

The literature was searched from 1900 to November 2018 on electronic databases: Medline, EMBASE, PsychInfo and CINAHL. Search terms related to smoking cessation, SCIs and socioeconomic status were used (Table 1). To limit restricting the search in relation to age, papers were manually screened to identify studies that used a relevant sample.

Table 1: PICO tool

| PICO         | Description                                                                                                                                                                                                                            | Search terms and connectors                                                                                                                                                                            |
|--------------|----------------------------------------------------------------------------------------------------------------------------------------------------------------------------------------------------------------------------------------|--------------------------------------------------------------------------------------------------------------------------------------------------------------------------------------------------------|
| Population   | Individuals from socioeconomically deprived groups, defined through either individual or area level indicators                                                                                                                         | (Depriv* or disadvantage* or inequit* or socioeconomic or socio-economic or sociodemographic or socio-demographic or social class or deprivation group or poverty or low income or social welfare).tw. |
| Intervention | A range of interventions including individual and group counselling, self-help materials, pharmacological interventions (e.g. nicotine replacement therapy), social and environmental support, comprehensive programmes and incentives | Smoking Cessation/ and (intervention* or initiative* or strategy* or program* or scheme* or outcome* or approach* ).tw.                                                                                |
| Comparison   | All study types with a pre/post intervention and/or a control group                                                                                                                                                                    | -                                                                                                                                                                                                      |
| Outcome      | Primary outcome: smoking abstinence<br>Secondary outcome: Moderating variables (e.g. nicotine dependence, quit motivation, self-efficacy, social support and influences)                                                               | ((nicotine or tobacco or smok* or cigarette) adj (quit* or stop* or cess* or cease* or cut down or "giv* up" or reduc* )).tw.                                                                          |

### Study eligibility criteria

1  
2  
3 All searches were restricted to high-income countries (24). Inclusion criteria for the included  
4  
5 publications were; '*Socioeconomically deprived groups*' that defined their sample through  
6  
7 individual level indicators (e.g. educational level, income) or area level indicators (e.g.  
8  
9 postcode). '*Older adults*', defined as aged 50 years + (or when the majority of the sample was  
10  
11 aged 40+) were included to represent a sample at or approaching lung cancer screening age  
12  
13 (25). The review included studies that examined behavioural aspects of SCIs and outcomes  
14  
15 including smoking abstinence and psychosocial variables such as quit motivation, nicotine  
16  
17 dependence, perceived social influence and quit determination.  
18  
19  
20  
21

### 22 **Data extraction and synthesis**

23  
24  
25 Study outcomes, including moderating variables and selected study features were extracted.  
26  
27 Where relevant, statistical associations between variables are described in order to examine  
28  
29 relationships within and between the included studies. Data from qualitative elements of  
30  
31 included studies were extracted and a narrative synthesis was conducted. Due to the  
32  
33 heterogeneity of included studies, a narrative synthesis was performed using guidance  
34  
35 outlined by Popay (26) and organised under relevant behavioural intervention elements.  
36  
37  
38  
39

### 40 **Critical Appraisal**

41  
42 The methodological quality of included studies and risk of bias was assessed using an  
43  
44 adapted Critical Appraisal Skills Programme (CASP) tool (27). Quality was assessed  
45  
46 according to each domain on the checklist including rationale, study design, recruitment,  
47  
48 sample size, data collection and analysis, ethical issues, reporting of findings and contribution  
49  
50 to research. The CASP tool was adapted to address quality of methods for verifying smoking  
51  
52 abstinence, intervention type, and socioeconomic and age variation within the sample.  
53  
54  
55

56 Overall quality was categorised as high, medium or low.  
57  
58

### 59 **Patient and Public Involvement**

1  
2  
3 Patient and public involvement was not adopted for the review.  
4  
5

## 6 **RESULTS**

7

8  
9 Eleven studies met the inclusion criteria (Figure 1). Nine of the 11 studies were quantitative  
10 (28-36) and two were mixed-methods design (37, 38). Three studies were randomised control  
11 trials, with the remaining using a range of non-randomised designs. Two studies (28, 34)  
12 were conducted in a lung screening context. Quality of included studies was high (n=2),  
13 medium (n=5) and low (n=4). Limitations of lower quality studies included measuring but  
14 not reporting a subgroup analysis of age and/or deprivation, study design, limited description  
15 of the intervention and statistically underpowered results. Where available, relevant  
16 statistical values are presented in Table 2.  
17  
18  
19  
20  
21  
22  
23  
24  
25  
26  
27

28 Nine studies used a combination of nicotine replacement therapy and behavioural counselling  
29 (28-30, 32-37). One study used only nicotine replacement therapy (31) and one used  
30 behavioural counselling without nicotine replacement therapy (38). Results are presented in  
31 relation to intervention elements including the behavioural content, setting, intervention  
32 provider and mode and duration of delivery. A sub-heading under each intervention element  
33 presents data on smoking outcomes. Further study characteristics and findings are also  
34 presented in Table 2.  
35  
36  
37  
38  
39  
40  
41  
42  
43  
44  
45  
46  
47  
48  
49  
50  
51  
52  
53  
54  
55  
56  
57  
58  
59  
60

Table 2: Study Characteristic

| Study (Country)                          | Study design                | Sample                                                                                                                                                                                                                                                          | Intervention                                                                                                                                                                                                      | Measure of smoking abstinence     | Summary of findings                                                                                                                                                                                                                                                                                                                                                                                                                                                                                   | Quality appraisal |
|------------------------------------------|-----------------------------|-----------------------------------------------------------------------------------------------------------------------------------------------------------------------------------------------------------------------------------------------------------------|-------------------------------------------------------------------------------------------------------------------------------------------------------------------------------------------------------------------|-----------------------------------|-------------------------------------------------------------------------------------------------------------------------------------------------------------------------------------------------------------------------------------------------------------------------------------------------------------------------------------------------------------------------------------------------------------------------------------------------------------------------------------------------------|-------------------|
| Bade et al (2016) (Germany)              | Randomised controlled trial | 4052 participants from the German lung cancer screening intervention trial. 1535 (62%) male, 950 (38%) female. 1737 (70%) aged 50-59 years, 748 (30%) 60-69 years old. 1823 (73%) 'low' in education and 1594 (65%) 'low' in vocational training.               | Low-dose multislice CT screening and smoking cessation counselling (SCC) delivered by a psychologist in a radiology department. 20 minute counselling followed by at least one telephone call.                    | Self-report at 12 and 24 months   | Proportion of current smokers decreased among screenees (3.4%, p<0.0001), controls (4.5%, p<0.0001), and entire cohort (4.0%, p<0.0001). The magnitude of decrease in smoking rate was larger in SSC participants (screenees 9.6%, p<0.0001; controls 10.4%, p<0.0001) compared to non-SSC participants (screenees 0.8%, p=0.30; controls 1.6%, p=0.03).                                                                                                                                              | High              |
| Bauld et al (2009) (United Kingdom)      | Observational study         | 1785 pharmacy service users. 762 (56%) in the Starting Fresh (SF) group and 311 (76%) in the Smoking Concerns (SC) group were aged 41 years or older. 796 (58%) from SF were in the lowest deprivation quintile, 187 (46%) from SC were in the lowest quintile. | Behavioural support delivered by a trained adviser in a group-based community setting (SC) up to 12 weeks or individually in a pharmacy setting (SF) up to 12 weeks, with access to nicotine replacement therapy. | Biochemical validation at 1 month | 146 (36%) quit rate in SC versus 255 (19%) in SF (OR <sup>1</sup> =1.98; 95% CI <sup>2</sup> 1.90 to 3.08). SC and SF deprived smokers had lower cessation rates (OR=0.677; p=0.015). Cessation rate for pharmacy clients increased sharply with age from 13.4% for age 16-40 to 30.7% for age 61 and over (p<0.001). The increase for group-based clients (SC) was statistically insignificant (p<0.25). Determination to quit was not statistically significant: P = 0.072 (SF) and P = 0.092 (SC). | Medium            |
| Celestin Jr et al (2016) (United States) | Retrospective cohort study  | 8, 549 tobacco users in Louisiana's public hospital facility. 1531 (68%) in the intervention group were aged 45 years and over. 1,196 (57%) were from the lowest 'financial class'.                                                                             | Standard care plus group behavioural counselling in a hospital classroom. 4 one-hour sessions, once a week within a 1-month period.                                                                               | Self-report at 12 months          | Intervention participants had greater odds of sustained abstinence than non-attendees (aOR <sup>3</sup> =1.52; 95% CI 1.21 to 1.90). Higher 12-month quit rate in patients over age 60 (22%) compared to 18-30 year olds (11%) (aOR 2.36; 95% CI 1.58 to 3.52). There was a statistically significant effect of COPD status on quit rate (from UOR 1.01 CI 0.86 to 1.19, to AOR 0.75 CI 0.63 to 0.90).                                                                                                | Low               |
| Copeland et al (2005) (United Kingdom)   | Observational cohort study  | 101 patients from a disadvantaged area of Edinburgh. Mean age for males was 47 years and for females was 44 years.                                                                                                                                              | GP consultation and subsequent prescription of nicotine replacement therapy                                                                                                                                       | Self-report at 3 months           | Post intervention 35 (35%) smoked the same, 46 (45%) were smoking less and 20 (20%) had stopped smoking. Older participants were more likely to have                                                                                                                                                                                                                                                                                                                                                  | Low               |

<sup>1</sup> Odds ratio  
<sup>2</sup> Confidence interval  
<sup>3</sup> Adjusted odds ratio

|                                          |                                         |                                                                                                                                        |                                                                                                                                                                                                                                  |                                                 |                                                                                                                                                                                                                                                                                                                                                                                                              |                                             |  |
|------------------------------------------|-----------------------------------------|----------------------------------------------------------------------------------------------------------------------------------------|----------------------------------------------------------------------------------------------------------------------------------------------------------------------------------------------------------------------------------|-------------------------------------------------|--------------------------------------------------------------------------------------------------------------------------------------------------------------------------------------------------------------------------------------------------------------------------------------------------------------------------------------------------------------------------------------------------------------|---------------------------------------------|--|
|                                          |                                         |                                                                                                                                        |                                                                                                                                                                                                                                  |                                                 |                                                                                                                                                                                                                                                                                                                                                                                                              | stopped or to be smoking less ( $p<0.00$ ). |  |
| Lasser et al (2017)<br>(United States)   | Prospective, randomised trial           | 352 participants randomised (177 intervention, 175 control). 197 (56%) aged 51-74. 193 (55%) with a household yearly income <\$20,000. | Patient navigation and financial incentive (intervention) versus enhanced traditional care (control). Intervention received 4 hours of support over 6 months. Delivered by patient navigators over the phone or in-person.       | Biochemical validation at 12 months             | 21 (12%) intervention participants quit smoking compared to 4 (2%) control participants (OR=5.8, 95% CI 1.9 to 17.1, $p<0.00$ ).<br>In the intervention arm ( $n=177$ ), participants aged 51-74 had higher quit rates compared to those aged 21-50 (19 [19.8%] vs 2 [2.0%]; $p<0.00$ ). Household yearly income of <\$20,000 had higher quit rates compared to >\$20,000 (15 [15.5%] vs 4 [8%]; $p=0.00$ ). | Medium                                      |  |
| Neumann et al (2013)<br>(Denmark)        | Observational prospective cohort study  | 20,588 disadvantaged patients (low level of education and receiving unemployment benefits). 15,244 (74%) aged 40 years or over.        | 6-week manualised Gold Standard Programme in hospitals and primary care facilities (e.g. pharmacies). Delivered in 5 meetings over 6 weeks by a certified staff member. Both group and individual counselling was offered.       | Self-reported continuous abstinence at 6 months | 34% of responders reported 6 months of continuous abstinence. Continuous abstinence was significantly lower in those with less education (30%) versus more education (35%) ( $p<0.00$ ). For participants with a lower educational level, individual counselling was a predictor of success in smoking cessation (OR=1.31, 95% CI 1.05 to 1.63).                                                             | Medium                                      |  |
| Ormston et al (2015)<br>(United Kingdom) | Mixed-methods, quasi-experimental study | 2042 smokers living in deprived areas of Dundee. 70 (54%) aged 45 years and over. 119 (92%) from the two most deprived areas.          | Financial incentive and behavioural support based on Scottish national guidelines, with pharmacotherapy (Quit4u Scheme) delivered in group (practice nurses) and one-to-one settings (community pharmacists) for up to 12 weeks. | Biochemical validation at 1, 3 and 12 months    | Intervention was responsible for 36% of all quit attempts in the three most deprived areas. 12 month quit rate (9.3%) was significantly higher than other Scottish stop smoking services (6.5%) (relative difference 1.443, 95% CI 1.132 to 1.839, $p=0.00$ ).                                                                                                                                               | Medium                                      |  |
| Park et al (2015)<br>(United States)     | Matched case control study              | 3336 National Lung Screening Trial participants.                                                                                       | SCI delivered by a primary care clinician using the 5As.                                                                                                                                                                         | Self-report at 12                               | Assist was associated with a 40% increase in quitting (OR=1.40, 95% CI 1.21 to 1.63).                                                                                                                                                                                                                                                                                                                        | Medium                                      |  |



1  
2  
3  
4  
5  
6  
7  
8  
9  
10  
11  
12  
13  
14  
15  
16  
17  
18  
19  
20  
21  
22  
23  
24  
25  
26  
27  
28  
29  
30  
31  
32  
33  
34  
35  
36  
37  
38  
39  
40  
41  
42  
43  
44  
45  
46

|                                               |                             |                                                                                                                                                                                                                                                   |                                                                                                                                                                                                                                                                                                                                                                                |                                                          |                                                                                                                                                                                                                                                                                                                                                                                                                                                                                                                                                                                         |      |
|-----------------------------------------------|-----------------------------|---------------------------------------------------------------------------------------------------------------------------------------------------------------------------------------------------------------------------------------------------|--------------------------------------------------------------------------------------------------------------------------------------------------------------------------------------------------------------------------------------------------------------------------------------------------------------------------------------------------------------------------------|----------------------------------------------------------|-----------------------------------------------------------------------------------------------------------------------------------------------------------------------------------------------------------------------------------------------------------------------------------------------------------------------------------------------------------------------------------------------------------------------------------------------------------------------------------------------------------------------------------------------------------------------------------------|------|
|                                               |                             | Aged 55 to 74 years old.<br>No report of deprivation at baseline.<br>Subgroup analysis performed for education.                                                                                                                                   |                                                                                                                                                                                                                                                                                                                                                                                | months                                                   | Arrange was associated with a 46% increase in quitting (OR=1.46, 95% CI 1.19 to 1.79). Higher educational level was significantly associated with quitting after delivery of each of the 5As (ORs=1.14 to 1.26 for college degree or higher versus high school education). Lower nicotine dependence (OR= 0.94, 95% CI 0.91-0.98), and higher quit motivation (OR=1.28, 95% CI 1.21-1.35) were significantly associated with quitting after delivery of each of the 5As                                                                                                                 |      |
| Sheffer et al (2013)<br>(United States)       | Observational study         | 7267 participants in telephone treatment: 30% aged >50 years, 35% aged 36-49 years.<br>In-person participants: 38% aged >50 years, 38% aged 36-49 years.<br>No report of deprivation at baseline.<br>Subgroup analysis performed for deprivation. | Behavioural counselling-manual driven sessions delivered weekly in-person (healthcare settings) or over the telephone, with free nicotine patches for 6 weeks. Delivered by a health care provider trained in brief evidence-based tobacco dependence interventions.                                                                                                           | Self-report at 3 and 6 months                            | Abstinence rates were higher for in-person counselling (37.7%) versus telephone counselling (30.8%) (p<0.00). No significant difference at 3 months (p=0.73) and 6 months (p=0.27) between in-person (28.2%; 27.2%) and telephone (28.7%; 28.7%). The highest socioeconomic (SES) group was more likely to be abstinent with telephone treatment (SES3: P =0.03; OR = 1.45; 95% CI = 1.04, 2.01). No significant differences between the in-person and telephone for the two lower SES groups (SES1: OR=1.02, 95% CI 0.88 to 1.18, p=0.82; SES2: OR=0.91, 95% CI 0.72 to 1.15, p=0.41). | Low  |
| Sheikhhattari et al (2016)<br>(United States) | Randomised controlled trial | 409 (52%) were aged 48 years and over.<br>Recruited in targeted communities where more than 40% of the households earn less than \$25,000. 531 (72%) were unemployed.                                                                             | Peer-led community-based intervention over three phases. Phase 1 (n=404) – the American Cancer Society’s 4-week Fresh Start smoking cessation curriculum expanded to 12 weeks at health centres and delivered by a doctor, nurse or social worker. Phase 2 (n=398) and Phase 3 (n=163) – tailored group counselling in community venues, delivered by trained peer motivators. | Self-report and biochemical validation at 3 and 6 months | Delivery of services in community settings was a predictor of quitting (OR=2.6, 95% CI 1.7 to 4.2). Smoking cessation increased from 38 (9.4%) in Phase 1 to 84 (21.1%) in Phase 2, and 49 (30.1%) in Phase 3. Phases 2 and 3 were associated with higher odds compared to Phase 1, with adjusted ORs of 2.1 (95% CI 1.3 to 3.5) and 3.7 (95%CI 2.1 to 6.3) respectively. Older age (>48 years versus <48 years) was associated with higher quit rate (13.3% vs 19.1%, p=0.028).                                                                                                        | High |

|    |                      |               |                                      |                                |             |                                               |
|----|----------------------|---------------|--------------------------------------|--------------------------------|-------------|-----------------------------------------------|
| 1  |                      |               |                                      |                                |             |                                               |
| 2  |                      |               |                                      |                                |             |                                               |
| 3  | Stewart et al (2010) | Pilot         | 44 women, aged 25-69, living on low  | Facilitated group support      | Self-report | The mean number of cigarettes smoked daily    |
| 4  | (Canada)             | evaluation of | income in urban areas of Western     | supplemented with one-to-one   | at 3 months | decreased from pre to post-test ( $p=0.00$ ). |
| 5  |                      | a before and  | Canada.                              | support from a mentor. Once a  |             | Among women completing all data collection    |
| 6  |                      | after study   | 23 (52%) aged 40 years or older.     | week, duration of 12 weeks     |             | ( $n=22$ ), the mean number of cigarettes     |
| 7  |                      |               | 18 (39%) participants unemployed, 26 | minimum. Groups facilitated by |             | consumed daily decreased from 0.95 pre-       |
| 8  |                      |               | (62%) on welfare/income support.     | professionals and former       |             | intervention to 0.32 immediately after the    |
| 9  |                      |               |                                      | smokers with the option of     |             | intervention, then increased to 0.64 at 3     |
| 10 |                      |               |                                      | one-to-one from peers in       |             | months post-intervention. Four women          |
| 11 |                      |               |                                      | community centres.             |             | reported sustained cessation.                 |
| 12 |                      |               |                                      |                                |             |                                               |
| 13 |                      |               |                                      |                                |             |                                               |
| 14 |                      |               |                                      |                                |             |                                               |
| 15 |                      |               |                                      |                                |             |                                               |
| 16 |                      |               |                                      |                                |             |                                               |
| 17 |                      |               |                                      |                                |             |                                               |
| 18 |                      |               |                                      |                                |             |                                               |
| 19 |                      |               |                                      |                                |             |                                               |
| 20 |                      |               |                                      |                                |             |                                               |
| 21 |                      |               |                                      |                                |             |                                               |
| 22 |                      |               |                                      |                                |             |                                               |
| 23 |                      |               |                                      |                                |             |                                               |
| 24 |                      |               |                                      |                                |             |                                               |
| 25 |                      |               |                                      |                                |             |                                               |
| 26 |                      |               |                                      |                                |             |                                               |
| 27 |                      |               |                                      |                                |             |                                               |
| 28 |                      |               |                                      |                                |             |                                               |
| 29 |                      |               |                                      |                                |             |                                               |
| 30 |                      |               |                                      |                                |             |                                               |
| 31 |                      |               |                                      |                                |             |                                               |
| 32 |                      |               |                                      |                                |             |                                               |
| 33 |                      |               |                                      |                                |             |                                               |
| 34 |                      |               |                                      |                                |             |                                               |
| 35 |                      |               |                                      |                                |             |                                               |
| 36 |                      |               |                                      |                                |             |                                               |
| 37 |                      |               |                                      |                                |             |                                               |
| 38 |                      |               |                                      |                                |             |                                               |
| 39 |                      |               |                                      |                                |             |                                               |
| 40 |                      |               |                                      |                                |             |                                               |
| 41 |                      |               |                                      |                                |             |                                               |
| 42 |                      |               |                                      |                                |             |                                               |
| 43 |                      |               |                                      |                                |             |                                               |
| 44 |                      |               |                                      |                                |             |                                               |
| 45 |                      |               |                                      |                                |             |                                               |
| 46 |                      |               |                                      |                                |             |                                               |

For peer review only

### **Behavioural intervention content**

Ten studies focused on meeting the individual participant's needs using education and motivational techniques including support and encouragement (28-30, 32-38). In all ten studies, the interventions involved used motivational techniques with varying levels of intensity (Table 2).

Nine studies used interventions that were of higher intensity (28-30, 32, 33, 35-38). These studies involved incorporating specific action planning, tailored by the participant's level of quit motivation (28), using a combination of manual-based teaching and patient education sessions including relapse prevention modules (36), motivational interviewing techniques (32), discussions on the benefits and costs of smoking versus cessation (33), empowering strategies to enhance self-efficacy (38) and cognitive behavioural content (35).

Three studies used financial incentives as part of their intervention (32, 36, 37). A randomised control trial conducted by Lasser et al (32) offered participants \$750 for abstinence at 12-month follow-up. This element of the intervention was combined with patient navigation in which trained navigators identified and discussed salient social contextual factors using motivational interviewing. Ormston et al (37) combined behavioural support with financial incentives to participants upon biochemically verified cessation.

### **Outcomes**

A study by Park et al (34) found that the 'assist' and 'arrange follow-up' elements of a brief SCI based on the 5As (ask, advise, assess, assist and arrange follow-up) alongside lung cancer screening significantly increased the odds of quitting. Results showed that the decrease in smoking rate was larger for participants who received behavioural support compared to those who did not. Smoking abstinence was higher in participants with a higher educational level. (Table 2).

1  
2  
3 Studies of interventions that involved using financial incentives found that older participants  
4 and those with the lowest income had higher quit rates (Table 2). Ormston et al (37) found  
5 that quit rates for the intervention group were significantly higher compared to other stop  
6 smoking services (Table 2). Seventy-one percent of participants reported that the incentive  
7 component was ‘*very*’ or ‘*quite useful*’ in helping them quit, with participants describing it as  
8 a ‘*bonus*’ or ‘*reward*’ to motivate them.  
9

10  
11  
12 Stewart et al (38) reported qualitative data on self-efficacy for quitting and found that  
13 participants thought the education they gained from the intervention increased their  
14 awareness of their smoking habits, reasons why they smoked and the importance of quitting.  
15  
16 Participants also reported an increase in the number of available support sources (e.g. parents,  
17 spouse and friends) along with a significant increase in perceived social support (38).  
18  
19

### 20 21 22 **Setting**

23  
24 Two studies took place in a lung screening setting (28, 34) and used contrasting forms of  
25 interventions. Park et al (34) offered a brief SCI delivered by a primary care clinician,  
26 whereas Bade et al (28) used a more intensive intervention delivered by a psychologist who  
27 was trained in tobacco treatment. The latter study used a randomised control trial design with  
28 a large sample size and took place in the radiology department before or after the  
29 participant’s screening.  
30  
31

32  
33 Five studies were delivered in a variety of easily accessible community settings including  
34 community pharmacies (29, 33, 37) and community venues such as centres and churches (29,  
35 36-38) (Table 2). Three studies took place at medical facilities such as local medical/health  
36 centres (31, 32, 35) and two studies took place in hospitals (30, 33). One study delivered the  
37 intervention in both community and primary care settings (33).  
38  
39

### 40 41 42 **Outcomes**

1  
2  
3 Stewart et al (38) used a community-based intervention that took place in a local community  
4 centre, familiar to participants. Findings from this small-scale pilot study of female smokers  
5 suggested that the number of cigarettes smoked decreased post-intervention (Table 2).  
6  
7

8  
9  
10 Ormston et al (37) compared intervention delivery in community pharmacies and behavioural  
11 support (both group and one-to one sessions) to other stop smoking services and  
12 demonstrated significantly higher quit rates in deprived communities (Table 2).  
13  
14

15  
16  
17 Bauld et al (29) showed that specialist-led group-based services have higher quit rates  
18 compared to one-to-one services that are provided by pharmacies. Cessation rates for  
19 pharmacy clients increased with age, and more deprived smokers had lower smoking  
20 cessation rates in both the pharmacy-led and one-to-one services (Table 2). Sheikhattari et al  
21 (36) found higher quit rates for community-based participants compared to those receiving  
22 support in clinics during phase 1 of the intervention (Table 2). Results from this study also  
23 showed that older age (defined as over 48 years) was associated with higher quit rates for  
24 participants.  
25  
26  
27  
28  
29  
30  
31  
32  
33  
34

### 35 36 37 **Provider**

38  
39 Interventions were delivered by a range of providers (Table 2). Seven studies employed  
40 healthcare professionals such as general practitioners, primary care practice nurses,  
41 psychologists and pharmacists (28, 30, 31, 33-35, 38). Two studies employed trained peer  
42 motivators to deliver their intervention. Sheikhattari et al (36) used peer motivators who were  
43 former smokers to deliver the behavioural sessions. Peer motivators lived or worked in the  
44 community and were trained in delivering the intervention. Lasser et al (32) used patient  
45 navigators who had completed 10 hours of training in motivational interviewing techniques  
46 and had experience of working in community settings.  
47  
48  
49  
50  
51  
52  
53  
54  
55  
56  
57

### 58 59 **Outcomes**

60

1  
2  
3 Smoking abstinence outcomes varied according to SCI provider (Table 2). A small-scale  
4  
5 observational study by Copeland et al (31) examined the use of nicotine replacement theory  
6  
7 and a brief GP consultation. Results showed that older smokers were more likely to have  
8  
9 stopped smoking (Table 2).

10  
11  
12  
13 Sheikhattari et al (36) demonstrated that subsequent phases of the intervention delivered by  
14  
15 trained peer facilitators were associated with higher odds of quitting compared to the first  
16  
17 phase where intervention delivery was conducted by a doctor, nurse or social worker (Table  
18  
19 2). Findings from Lasser et al (32) demonstrated that older participants and those with a  
20  
21 lower household yearly income had higher quit rates (Table 2).

22  
23  
24  
25 Qualitative data from Stewart et al (38) demonstrated that participants felt peer facilitators  
26  
27 helped to support their cessation efforts as they were able to share personal experiences and  
28  
29 strategies. Participants reported that they were able to learn coping strategies and techniques  
30  
31 from other participants in the group which then helped them with their quit attempt.  
32  
33

### 34 35 **Mode and duration**

36  
37  
38 Studies varied in the mode and duration of delivery of SCIs (Table 2). Seven studies  
39  
40 examined both individual and group behavioural counselling sessions (29, 30, 32, 33, 35, 37,  
41  
42 38) (Table 2) and four studies used only one-to-one behavioural support (28, 31, 32, 34).

43  
44  
45 Duration of interventions varied greatly between and within studies (Table 2). The shortest  
46  
47 duration was an intervention embedded in a GP consultation (31) and the longest was 16  
48  
49 weeks of smoking cessation support (38).

### 50 51 52 **Outcomes**

53  
54  
55 Bauld et al (29) showed that participants accessing group-based services were almost twice as  
56  
57 likely as those who used individual pharmacy-based support to have quit smoking at four  
58  
59 weeks (Table 2). Similarly, Celestin et al (30) showed that attendees of group behavioural  
60

1  
2  
3 counselling had significantly higher long-term quit rates compared to non-attendees.

4  
5 Sheikhattari et al (36) used a six-week group-counselling module followed by a six-week  
6  
7 relapse prevention module. Higher odds of quitting were associated with later phases of the  
8  
9 intervention in which community-based group counselling was delivered (Table 2).

10  
11  
12  
13 Lasser et al (32) delivered their one-to-one behavioural support over six months either in-  
14  
15 person or over the telephone, with a goal of four hours per participant. Results demonstrated  
16  
17 that more participants from the intervention group had quit smoking in comparison to the  
18  
19 control group (Table 2). Bade et al (28) also employed behavioural counselling in-person,  
20  
21 with at least one subsequent telephone call for those who had specified a quit date.

22  
23  
24 Participants were offered four telephone calls that lasted around 20 minutes in duration and  
25  
26 findings demonstrated a larger decrease in smoking for screening attendees compared to non-  
27  
28 attendees (Table 2).

29  
30  
31  
32 Sheffer et al (35) delivered both telephone and in-person behavioural counselling. Smoking  
33  
34 abstinence rates were higher for in-person counselling, with smokers from higher  
35  
36 socioeconomic groups more likely to quit after telephone counselling than smokers from  
37  
38 lower socioeconomic groups. Neumann et al (33) offered either group or individual  
39  
40 counselling and demonstrated that for those with a lower educational level, individual  
41  
42 counselling was a predictor of smoking cessation (Table 2).

### 43 44 45 46 **Moderating variables**

47  
48  
49 Seven studies reported limited data on moderating variables (28-30, 32, 34-36). Bauld et al  
50  
51 (29) found that smokers who reported being '*extremely determined*' to quit were more likely  
52  
53 to be successful in their quit attempt. Celestin et al (30) demonstrated that COPD status had a  
54  
55 statistically significant effect on quit rates (Table 2) and Park and colleagues (34) showed that  
56  
57 lower nicotine dependence and higher quit motivation were significantly associated with  
58  
59  
60

1  
2  
3 quitting after the delivery of each of the 5As. Three RCTs demonstrated that participants who  
4 had a lower Fagerstrom score (36), who were contemplating quitting (32) and reported high  
5 readiness to quit (28) at baseline were more likely to have abstained from smoking post-  
6  
7 intervention.  
8  
9

## 10 11 12 **DISCUSSION**

13  
14  
15  
16 To our knowledge, this systematic review is the first to examine the influence of behavioural  
17 SCIs for an older, deprived population. The majority of included studies used a combination  
18 of pharmacotherapy and a form of behavioural counselling, supporting previous evidence that  
19 a combined approach is the most effective for older, deprived smokers (21). Additionally,  
20 findings relating to the intensity, provider, mode, duration and setting of behavioural  
21 counselling are encouraging. Behavioural counselling delivered in a community setting and  
22 tailored to individual needs appeared to demonstrate a positive impact on smoking cessation  
23 outcomes.  
24  
25  
26  
27  
28  
29  
30  
31  
32  
33  
34

35 Behavioural interventions identified in the current review used a range of approaches and  
36 although none of the included studies explicitly described their intervention as "tailored",  
37 many used a form of behavioural counselling that was implicitly flexible according to the  
38 needs of the individuals. Interventions were implemented in locations that addressed barriers  
39 to access, such as local community centres, and intervention content was driven by the  
40 individual's psychological needs (29, 36-38). Previous research suggests that in order for  
41 people to access stop smoking services, the appointments should be flexible and accessible  
42 (39).  
43  
44  
45  
46  
47  
48  
49  
50  
51  
52  
53

54 The optimal mode and duration of intervention was unclear from our review, with findings  
55 suggesting varying success for both group and one-to-one behavioural support. The current  
56 results reflect similar findings from a review conducted in the UK. Bauld et al (21) concluded  
57  
58  
59  
60



1  
2  
3 that due to a dearth of studies examining subpopulations of smokers, further research is  
4  
5 needed to determine the most effective models of treatment for smoking cessation and their  
6  
7 efficacy with these subgroups (21). The current review did, however, demonstrate that certain  
8  
9 aspects of behavioural interventions, such as incentives, the use of peer facilitators and more  
10  
11 intensive counselling are promising for encouraging cessation in older, deprived smokers.  
12  
13 Additionally, limited data regarding the influence of moderating variables suggests that  
14  
15 factors such as nicotine dependence, quit motivation and pre-existing health conditions such  
16  
17 as COPD can impact the effectiveness of smoking cessation interventions. Future research  
18  
19 should aim to understand the needs and preferences of older, deprived smokers and focus on  
20  
21 psychosocial mechanisms that can be targeted in more holistic level interventions.  
22  
23  
24  
25

26  
27 The eleven studies included in the review were heterogeneous in design, SCI modality,  
28  
29 sample size, intervention timing and measurement of smoking abstinence. Some of the  
30  
31 included studies did not report confidence intervals, thus making it difficult to interpret  
32  
33 findings. Only three of the studies included were randomised control trials, of which one was  
34  
35 underpowered (32), thus the effectiveness results across the studies were modest. Chen and  
36  
37 Wu (40) also identified the need for controlled trials of SCIs for older smoker, in order to  
38  
39 better understand the most suitable form of intervention for this population. Similarly to  
40  
41 findings from Pineiro et al's systematic review (41), the studies in the current review did not  
42  
43 consistently use biochemical verification of smoking cessation, with most relying on self-  
44  
45 reported smoking cessation (Table 2).  
46  
47  
48  
49

50  
51 Various design aspects of the included studies, including the use of non-randomised methods,  
52  
53 limited the extent to which firm conclusions can be drawn about the effectiveness of  
54  
55 behavioural SCIs for older, deprived smokers. Only two studies included qualitative process  
56  
57 evaluation data, limiting the ability to understand why specific intervention characteristics  
58  
59 were more or less likely to influence smoking cessation outcomes. Evidence suggests that  
60

1  
2  
3 smokers from disadvantaged backgrounds face particular obstacles to successful quitting such  
4 as lack of support, higher nicotine dependence and life stress (20). Further mixed-methods  
5 research is therefore warranted to understand why some forms of SCI support may be more  
6 suited to mitigating these barriers in the target population.  
7  
8  
9  
10

11  
12  
13 The findings indicate a clear lack of evidence from large-scale trials of effectiveness in a lung  
14 screening context as well as a lack of data reporting psychosocial moderators of cessation for  
15 older, deprived smokers. We acknowledge methodological limitations of the present  
16 systematic review. By restricting the inclusion criteria for age and socioeconomic group,  
17 several potentially relevant studies were excluded. For example, telephone-based counselling  
18 for smokers undergoing lung cancer screening, involving messages about risks of smoking in  
19 the context of lung scan results, can improve self-efficacy for quitting and the likelihood of a  
20 successful quit attempt (42). However, our review highlights the current absence of robust  
21 evidence regarding behavioural SCIs that are effective for the lung screening eligible  
22 population of older deprived smokers.  
23  
24  
25  
26  
27  
28  
29  
30  
31  
32  
33  
34  
35

## 36 **CONCLUSION**

37  
38  
39 Our systematic review demonstrates the potential for tailored, multimodal SCIs for older,  
40 deprived smokers that can be embedded within disadvantaged communities. With the  
41 prospect of lung cancer screening being implemented in the UK and Europe in the near  
42 future, this research adds to the evidence base regarding promising SCIs for older, deprived  
43 populations who will benefit most from lung screening and integrated smoking cessation  
44 support. Further studies to understand the psychosocial barriers to quitting in the target  
45 population should be conducted to inform the design and conduct of high-quality trials of  
46 intervention effectiveness in older, deprived smokers.  
47  
48  
49  
50  
51  
52  
53  
54  
55  
56  
57  
58  
59  
60

## DECLARATION

### Competing Interests

The authors declare that they have no competing interests.

### Data availability statement

All data derived from the review search (i.e. included papers and their relevant references) have been included in the paper along with the search terms that were used.

### Funding statement

This study was funded by School of Medicine, Cardiff University. RP is funded by a Cancer Research UK Population Research Committee Post-Doctoral Fellowship. AN's and MM's posts are supported by Marie Curie core grant funding (grant reference: MCCCFCO-11-C).

### Authors' contribution

Pamela Smith, Prof Kate Brain, Mala Mann, Prof Annmarie Nelson and Dr Graham Moore were responsible for the concept, overall design and conduct of the review. MM gave additional support and advice on methodology including the search strategy. PS was responsible for collection of data and manuscript preparation. Dr Ria Poole double-checked 20% of included abstracts and full-texts. RP, MM, AN, GM and KB reviewed the edited manuscript preparation. All authors were involved in the interpretation of the results and approved the final version of the manuscript.

### Acknowledgements

We would like to thank Dr Grace McCutchan for her support and guidance throughout the review process.

## References

1. World Health Organisation. Report on the Global Tobacco Epidemic 2008 [Available from: [www.who.int/tobacco/mpower/en/](http://www.who.int/tobacco/mpower/en/)].
2. Office for National Statistics, Adult smoking habits in the UK: 2017. 2018 [cited 2019 February]. Available from: <https://www.ons.gov.uk/peoplepopulationandcommunity/healthandsocialcare/healthandlifeexpectancies/bulletins/adultsmokinghabitsingreatbritain/2017>.
3. Office for National Statistics.: Adult smoking habits in Great Britain 2017. ; 2017 [Available from: <http://ash.org.uk/category/information-and-resources/fact-sheets/>].
4. Information Services Division (ISD). : NHS National Services Scotland; 2012 [Available from: <http://www.isdscotland.org/Health-Topics/Cancer/Publications/2012-04-24/2012-04-24-Cancer-Incidence-report.pdf?49042910338>].
5. Welsh Cancer Intelligence and Surveillance Unit: Public Health Wales; 2015 [
6. Shack L, Jordan C, Thomson CS, Mak V, Moller H, Registries UKAoC. Variation in incidence of breast, lung and cervical cancer and malignant melanoma of skin by socioeconomic group in England. *BMC Cancer*. 2008;8:271.
7. Humphrey LL, Deffebach M, Pappas M, Baumann C, Artis K, Mitchell JP, et al. Screening for lung cancer with low-dose computed tomography: a systematic review to update the US Preventive services task force recommendation. *Ann Intern Med*. 2013;159(6):411-20.
8. Ashraf H, Tonnesen P, Holst Pedersen J, Dirksen A, Thorsen H, Dossing M. Effect of CT screening on smoking habits at 1-year follow-up in the Danish Lung Cancer Screening Trial (DLCST). *Thorax*. 2009;64(5):388-92.
9. Brain K, Carter B, Lifford KJ, Burke O, Devaraj A, Baldwin DR, et al. Impact of low-dose CT screening on smoking cessation among high-risk participants in the UK Lung Cancer Screening Trial. *Thorax*. 2017;72(10):912-8.
10. Tammemagi MC, Berg CD, Riley TL, Cunningham CR, Taylor KL. Impact of lung cancer screening results on smoking cessation. *J Natl Cancer Inst*. 2014;106(6):dju084.
11. van der Aalst CM, van den Bergh KA, Willemsen MC, de Koning HJ, van Klaveren RJ. Lung cancer screening and smoking abstinence: 2 year follow-up data from the Dutch-Belgian randomised controlled lung cancer screening trial. *Thorax*. 2010;65(7):600-5.
12. Bryant J, Bonevski B, Paul C. A survey of smoking prevalence and interest in quitting among social and community service organisation clients in Australia: a unique opportunity for reaching the disadvantaged. *BMC Public Health*. 2011;11:827.
13. Hiscock R, Judge K, Bauld L. Social inequalities in quitting smoking: what factors mediate the relationship between socioeconomic position and smoking cessation? *J Public Health (Oxf)*. 2011;33(1):39-47.
14. Vangeli E, West R. Sociodemographic differences in triggers to quit smoking: findings from a national survey. *Tob Control*. 2008;17(6):410-5.
15. Chandola T, Head J, Bartley M. Socio-demographic predictors of quitting smoking: how important are household factors? *Addiction*. 2004;99(6):770-7.
16. Mermelstein R, Cohen S, Lichtenstein E, Baer JS, Kamarck T. Social support and smoking cessation and maintenance. *J Consult Clin Psychol*. 1986;54(4):447-53.
17. Benowitz NL. Nicotine addiction. *N Engl J Med*. 2010;362(24):2295-303.
18. Fiore MC, Jaen CR, Baker TB, Bailey WC, Benowitz NL, Curry SJ, et al. Treating tobacco use and dependence: 2008 update US Public Health Service Clinical Practice Guideline executive summary. *Respiratory Care*. 2008;53(9):1217-22.
19. Bauld L, Judge K, Platt S. Assessing the impact of smoking cessation services on reducing health inequalities in England: observational study. *Tob Control*. 2007;16(6):400-4.
20. Hiscock R, Bauld L, Amos A, Fidler JA, Munafò M. Socioeconomic status and smoking: a review. *Ann N Y Acad Sci*. 2012;1248:107-23.

- 1
- 2
- 3
- 4 21. Bauld L, Bell K, McCullough L, Richardson L, Greaves L. The effectiveness of NHS smoking
- 5 cessation services: a systematic review. *J Public Health (Oxf)*. 2010;32(1):71-82.
- 6 22. Iaccarino JM, Duran C, Slatore CG, Wiener RS, Kathuria H. Combining smoking cessation
- 7 interventions with LDCT lung cancer screening: A systematic review. *Prev Med*. 2019;121:24-32.
- 8 23. Moher D, Liberati A, Tetzlaff J, Altman DG, Group P. Preferred reporting items for systematic
- 9 reviews and meta-analyses: the PRISMA statement. *J Clin Epidemiol*. 2009;62(10):1006-12.
- 10 24. The World Bank [cited October 2018]. Available from: [https://data.worldbank.org/income-](https://data.worldbank.org/income-level/high-income)
- 11 [level/high-income](https://data.worldbank.org/income-level/high-income).
- 12 25. Oudkerk M, Devaraj A, Vliegthart R, Henzler T, Prosch H, P Heussel C, et al. European
- 13 position statement on lung cancer screening2017. e754-e66 p.
- 14 26. Popay JR, H. M.; Sowden, A.; Petticrew, M.; Arai, L.; Rodgers, M.; Britten, N. . Guidance on
- 15 the conduct of narrative synthesis in systematic reviews: Institute for Health Research; 2006 [
- 16 27. Singh J. Critical Appraisal Skills Programme. CASP Appraisal Tools2013. 76 p.
- 17 28. Bade M, Bahr V, Brandt U, Eigentopf A, Bruchert T, Gross ML, et al. Effect of smoking
- 18 cessation counseling within a randomised study on early detection of lung cancer in Germany.
- 19 2016:959-68, 2016 May.
- 20 29. Bauld L, Chesterman J, Ferguson J, Judge K. A comparison of the effectiveness of group-
- 21 based and pharmacy-led smoking cessation treatment in Glasgow. 2009:308-16, 2009 Feb.
- 22 30. Celestin MD, Tseng TS, Moody-Thomas S, Jones-Winn K, Hayes C, Guillory D, et al.
- 23 Effectiveness of group behavioral counseling on long-term quit rates in primary health care.
- 24 *Translational Cancer Research*. 2016;5(Supplement5):972-82.
- 25 31. Copeland L, Robertson R, Elton R. What happens when GPs proactively prescribe NRT
- 26 patches in a disadvantaged community. *Scottish Medical Journal*. 2005:64-8, 2005 May.
- 27 32. Lasser KE, Quintiliani LM, Truong V, Xuan Z, Murillo J, Jean C, et al. Effect of Patient
- 28 Navigation and Financial Incentives on Smoking Cessation Among Primary Care Patients at an Urban
- 29 Safety-Net Hospital: A Randomized Clinical Trial. *JAMA Internal Medicine*. 2017:1798-807, 2017 Dec
- 30 01.
- 31 33. Neumann T, Rasmussen M, Ghith N, Heitmann BL, Tonnesen H. The Gold Standard
- 32 Programme: smoking cessation interventions for disadvantaged smokers are effective in a real-life
- 33 setting. *Int J Environ Res Public Health*. 2013:e9, 2013 Nov.
- 34 34. Park ER, Gareen IF, Japuntich S, Lennes I, Hyland K, De Mello S, et al. Primary care provider-
- 35 delivered smoking cessation interventions and smoking cessation among participants in the national
- 36 lung screening trial. *JAMA Internal Medicine*. 2015;175(9):1509-16.
- 37 35. Sheffer C, Stitzer M, Landes R, Brackman SL, Munn T. In-Person and Telephone Treatment of
- 38 Tobacco Dependence: A Comparison of Treatment Outcomes and Participant Characteristics.
- 39 *American Journal of Public Health*. 2013;103(8):E74-E82.
- 40 36. Sheikhattari P, Apata J, Kamangar F, Schutzman C, O'Keefe A, Buccheri J, et al. Examining
- 41 Smoking Cessation in a Community-Based Versus Clinic-Based Intervention Using Community-Based
- 42 Participatory Research. 2016:1146-52, 2016 Dec.
- 43 37. Ormston R, van der Pol M, Ludbrook A, McConville S, Amos A. quit4u: the effectiveness of
- 44 combining behavioural support, pharmacotherapy and financial incentives to support smoking
- 45 cessation. 2015:121-33, 2015 Feb.
- 46 38. Stewart MJ, Kushner KE, Greaves L, Letourneau N, Spitzer D, Boscoe M. Impacts of a support
- 47 intervention for low-income women who smoke. 2010:1901-9, 2010 Dec.
- 48 39. Venn A, Dickinson A, Murray R, Jones L, Li J, Parrott S, et al. Effectiveness of a mobile, drop-
- 49 in stop smoking service in reaching and supporting disadvantaged UK smokers to quit. *Tob Control*.
- 50 2016;25(1):33-8.
- 51 40. Chen D, Wu LT. Smoking cessation interventions for adults aged 50 or older: A systematic
- 52 review and meta-analysis. *Drug Alcohol Depend*. 2015;154:14-24.
- 53
- 54
- 55
- 56
- 57
- 58
- 59
- 60

- 1  
2  
3 41. Pineiro B, Simmons VN, Palmer AM, Correa JB, Brandon TH. Smoking cessation interventions  
4 within the context of Low-Dose Computed Tomography lung cancer screening: A systematic review.  
5 Lung Cancer. 2016;98:91-8.  
6  
7 42. Zeliadt SB, Greene PA, Krebs P, Klein DE, Feemster LC, Au DH, et al. A Proactive Telephone-  
8 Delivered Risk Communication Intervention for Smokers Participating in Lung Cancer Screening: A  
9 Pilot Feasibility Trial. Journal of Smoking Cessation. 2018;13(3):137-44.  
10  
11  
12  
13  
14  
15  
16  
17  
18  
19  
20  
21  
22  
23  
24  
25  
26  
27  
28  
29  
30  
31  
32  
33  
34  
35  
36  
37  
38  
39  
40  
41  
42  
43  
44  
45  
46  
47  
48  
49  
50  
51  
52  
53  
54  
55  
56  
57  
58  
59  
60

For peer review only

1  
2  
3  
4  
5  
6  
7  
8  
9  
10  
11  
12  
13  
14  
15  
16  
17  
18  
19  
20  
21  
22  
23  
24  
25  
26  
27  
28  
29  
30  
31  
32  
33  
34  
35  
36  
37  
38  
39  
40  
41  
42  
43  
44  
45  
46  
47  
48  
49  
50  
51  
52  
53  
54  
55  
56  
57  
58  
59  
60

**FIGURE LEGEND**

Figure 1: PRISMA Flow Diagram

For peer review only

Figure 1: PRISMA Flow Diagram

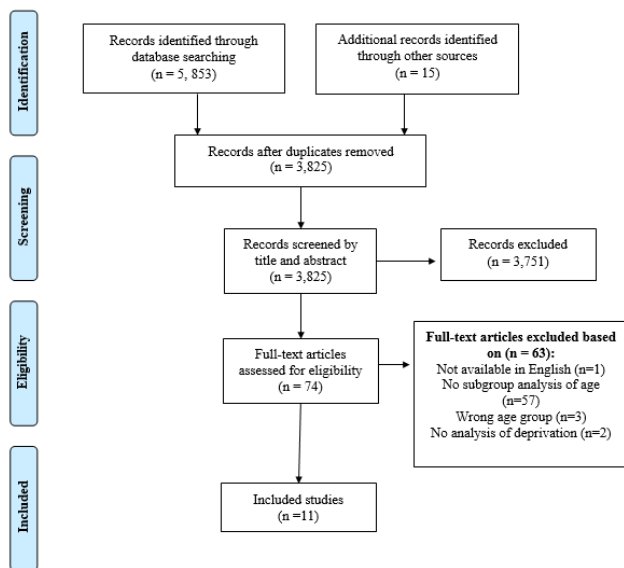

Peer review only



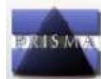

# PRISMA 2009 checklist

| Section/topic                      | #  | Checklist item                                                                                                                                                                                                                                                                                              | Reported on page # |
|------------------------------------|----|-------------------------------------------------------------------------------------------------------------------------------------------------------------------------------------------------------------------------------------------------------------------------------------------------------------|--------------------|
| <b>TITLE</b>                       |    |                                                                                                                                                                                                                                                                                                             |                    |
| Title                              | 1  | Identify the report as a systematic review, meta-analysis, or both.                                                                                                                                                                                                                                         | 1                  |
| <b>ABSTRACT</b>                    |    |                                                                                                                                                                                                                                                                                                             |                    |
| Structured summary                 | 2  | Provide a structured summary including, as applicable: background; objectives; data sources; study eligibility criteria, participants, and interventions; study appraisal and synthesis methods; results; limitations; conclusions and implications of key findings; systematic review registration number. | 2                  |
| <b>INTRODUCTION</b>                |    |                                                                                                                                                                                                                                                                                                             |                    |
| Rationale                          | 3  | Describe the rationale for the review in the context of what is already known.                                                                                                                                                                                                                              | 3,4                |
| Objectives                         | 4  | Provide an explicit statement of questions being addressed with reference to participants, interventions, comparisons, outcomes, and study design (PICOS).                                                                                                                                                  | 3,4                |
| <b>METHODS</b>                     |    |                                                                                                                                                                                                                                                                                                             |                    |
| Protocol and registration          | 5  | Indicate if a review protocol exists, if and where it can be accessed (e.g., Web address), and, if available, provide registration information including registration number.                                                                                                                               | 5                  |
| Eligibility criteria               | 6  | Specify study characteristics (e.g., PICOS, length of follow-up) and report characteristics (e.g., years considered, language, publication status) used as criteria for eligibility, giving rationale.                                                                                                      | 6                  |
| Information sources                | 7  | Describe all information sources (e.g., databases with dates of coverage, contact with study authors to identify additional studies) in the search and date last searched.                                                                                                                                  | 6                  |
| Search                             | 8  | Present full electronic search strategy for at least one database, including any limits used, such that it could be repeated.                                                                                                                                                                               |                    |
| Study selection                    | 9  | State the process for selecting studies (i.e., screening, eligibility, included in systematic review, and, if applicable, included in the meta-analysis).                                                                                                                                                   | 6,7                |
| Data collection process            | 10 | Describe method of data extraction from reports (e.g., piloted forms, independently, in duplicate) and any processes for obtaining and confirming data from investigators.                                                                                                                                  | 6                  |
| Data items                         | 11 | List and define all variables for which data were sought (e.g., PICOS, funding sources) and any assumptions and simplifications made.                                                                                                                                                                       | 6                  |
| Risk of bias in individual studies | 12 | Describe methods used for assessing risk of bias of individual studies (including specification of whether this was done at the study or outcome level), and how this information is to be used in any data synthesis.                                                                                      | 7                  |
| Summary measures                   | 13 | State the principal summary measures (e.g., risk ratio, difference in means).                                                                                                                                                                                                                               | n/a                |
| Synthesis of results               | 14 | Describe the methods of handling data and combining results of studies, if done, including measures of consistency (e.g., $I^2$ ) for each meta-analysis.                                                                                                                                                   | n/a                |



# PRISMA 2009 checklist

| Section/topic                 | #  | Checklist item                                                                                                                                                                                           | Reported on page # |
|-------------------------------|----|----------------------------------------------------------------------------------------------------------------------------------------------------------------------------------------------------------|--------------------|
| Risk of bias across studies   | 15 | Specify any assessment of risk of bias that may affect the cumulative evidence (e.g., publication bias, selective reporting within studies).                                                             | 7                  |
| Additional analyses           | 16 | Describe methods of additional analyses (e.g., sensitivity or subgroup analyses, meta-regression), if done, indicating which were pre-specified.                                                         | n/a                |
| <b>RESULTS</b>                |    |                                                                                                                                                                                                          |                    |
| Study selection               | 17 | Give numbers of studies screened, assessed for eligibility, and included in the review, with reasons for exclusions at each stage, ideally with a flow diagram.                                          | Supp. File, 8      |
| Study characteristics         | 18 | For each study, present characteristics for which data were extracted (e.g., study size, PICOS, follow-up period) and provide the citations.                                                             | 13-18              |
| Risk of bias within studies   | 19 | Present data on risk of bias of each study and, if available, any outcome level assessment (see item 12).                                                                                                | 13-18              |
| Results of individual studies | 20 | For all outcomes considered (benefits or harms), present, for each study: (a) simple summary data for each intervention group (b) effect estimates and confidence intervals, ideally with a forest plot. | 9-12               |
| Synthesis of results          | 21 | Present results of each meta-analysis done, including confidence intervals and measures of consistency.                                                                                                  | n/a                |
| Risk of bias across studies   | 22 | Present results of any assessment of risk of bias across studies (see Item 15).                                                                                                                          | n/a                |
| Additional analysis           | 23 | Give results of additional analyses, if done (e.g., sensitivity or subgroup analyses, meta-regression [see Item 16]).                                                                                    | n/a                |
| <b>DISCUSSION</b>             |    |                                                                                                                                                                                                          |                    |
| Summary of evidence           | 24 | Summarize the main findings including the strength of evidence for each main outcome; consider their relevance to key groups (e.g., healthcare providers, users, and policy makers).                     | 18-20              |
| Limitations                   | 25 | Discuss limitations at study and outcome level (e.g., risk of bias), and at review-level (e.g., incomplete retrieval of identified research, reporting bias).                                            | 18-20              |
| Conclusions                   | 26 | Provide a general interpretation of the results in the context of other evidence, and implications for future research.                                                                                  | 20                 |
| <b>FUNDING</b>                |    |                                                                                                                                                                                                          |                    |
| Funding                       | 27 | Describe sources of funding for the systematic review and other support (e.g., supply of data); role of funders for the systematic review.                                                               | 21                 |

From: Moher D, Liberati A, Tetzlaff J, Altman DG, The PRISMA Group (2009). Preferred Reporting Items for Systematic Reviews and Meta-Analyses: The PRISMA Statement. PLoS Med 6(6): e1000097. doi:10.1371/journal.pmed1000097

For more information, visit: [www.prisma-statement.org](http://www.prisma-statement.org).

# BMJ Open

## Systematic review of behavioural smoking cessation interventions for older smokers from deprived backgrounds

|                                 |                                                                                                                                                                                                                                                                                                                                                                                                                       |
|---------------------------------|-----------------------------------------------------------------------------------------------------------------------------------------------------------------------------------------------------------------------------------------------------------------------------------------------------------------------------------------------------------------------------------------------------------------------|
| Journal:                        | <i>BMJ Open</i>                                                                                                                                                                                                                                                                                                                                                                                                       |
| Manuscript ID                   | bmjopen-2019-032727.R2                                                                                                                                                                                                                                                                                                                                                                                                |
| Article Type:                   | Original research                                                                                                                                                                                                                                                                                                                                                                                                     |
| Date Submitted by the Author:   | 02-Oct-2019                                                                                                                                                                                                                                                                                                                                                                                                           |
| Complete List of Authors:       | Smith, Pamela; Cardiff University, Division of Population Medicine<br>Poole, Ria; Cardiff University, Division of Population Medicine<br>Mann, Mala; Cardiff University, Specialist Unit for Review Evidence<br>Nelson, Annmarie; Cardiff University, Marie Curie Research Centre<br>Moore, Graham; Cardiff University, School of Social Sciences<br>Brain, Kate; Cardiff University, Division of Population Medicine |
| <b>Primary Subject Heading</b>: | Public health                                                                                                                                                                                                                                                                                                                                                                                                         |
| Secondary Subject Heading:      | Public health, Smoking and tobacco                                                                                                                                                                                                                                                                                                                                                                                    |
| Keywords:                       | SOCIAL MEDICINE, PUBLIC HEALTH, PREVENTIVE MEDICINE                                                                                                                                                                                                                                                                                                                                                                   |
|                                 |                                                                                                                                                                                                                                                                                                                                                                                                                       |

SCHOLARONE™  
Manuscripts

1  
2  
3 Systematic review of behavioural smoking cessation interventions for older smokers from  
4  
5  
6 deprived backgrounds  
7

8 Authors: Pamela Smith\*<sup>a</sup>, Ria Poole<sup>a</sup>, Mala Mann<sup>b</sup>, Annmarie Nelson<sup>c</sup>, Graham Moore<sup>d</sup>,  
9  
10  
11 Kate Brain<sup>a</sup>  
12

13  
14 \*corresponding author

15 [Smithp18@cardiff.ac.uk](mailto:Smithp18@cardiff.ac.uk)

16  
17 8<sup>th</sup> Floor, Neuadd Meirionnydd, Heath Park, CF14 4YS

18  
19 02920 687695  
20  
21  
22  
23

24 <sup>a</sup> Division of Population Medicine, Cardiff University, Heath Park, Cardiff, UK, CF14 4YS

25 <sup>b</sup> Cardiff University, Specialist Unit for Review Evidence, Cardiff, UK, CF14 4YS

26 <sup>c</sup> Cardiff University, Marie Curie Research Centre, Cardiff, UK, CF14 4YS

27 <sup>d</sup> Cardiff University, School of Social Sciences, 1-3 Museum Place, Cardiff, UK CF10 3BD  
28  
29  
30  
31  
32  
33  
34  
35  
36  
37  
38  
39  
40  
41  
42  
43  
44  
45  
46  
47  
48  
49  
50  
51  
52  
53  
54  
55  
56  
57  
58  
59  
60

## ABSTRACT

### Introduction

The associations between smoking prevalence, socioeconomic group and lung cancer outcomes are well established. There is currently limited evidence for how inequalities could be addressed through specific smoking cessation interventions (SCIs) for a lung cancer screening eligible population. This systematic review aims to identify the behavioural elements of SCIs used in older adults from low socioeconomic groups, and to examine their impact on smoking abstinence and psychosocial variables.

### Method

Systematic searches of Medline, EMBASE, PsychInfo and CINAHL up to November 2018 were conducted. Included studies examined the characteristics of SCIs and their impact on relevant outcomes including smoking abstinence, quit motivation, nicotine dependence, perceived social influence and quit determination. Included studies were restricted to socioeconomically deprived older adults who are at (or approaching) eligibility for lung cancer screening. Narrative data synthesis was conducted.

### Results

Eleven studies met the inclusion criteria. Methodological quality was variable, with most studies using self-reported smoking cessation and varying length of follow-up. There were limited data to identify the optimal form of behavioural SCI for the target population. Intense multimodal behavioural counselling that uses incentives and peer facilitators, delivered in a community setting and tailored to individual needs indicated a positive impact on smoking outcomes.

### Conclusion

1  
2  
3 Tailored, multimodal behavioural interventions embedded in local communities could  
4  
5 potentially support cessation among older, deprived smokers. Further high-quality research is  
6  
7 needed to understand the effectiveness of SCIs in the context of lung screening for the target  
8  
9 population.  
10  
11  
12

13 Keywords: Smoking, smoking cessation, older, deprived, lung cancer, lung cancer screening  
14  
15

#### 16 Article summary

17  
18

- 19 • There is a current gap in knowledge about the most suitable form of behavioural  
20 smoking cessation intervention (SCI) for older, deprived smokers who are most likely  
21 to be eligible for lung screening  
22  
23
- 24 • This systematic review suggests that tailored, multimodal behavioural SCIs could  
25 support smoking cessation for those most likely to be eligible for lung screening;  
26 however, the studies included in the review were heterogeneous in design, SCI  
27 modality, sample size, intervention timing and measurement of smoking abstinence  
28  
29
- 30 • There is a lack of rigorous, high quality research for the target population  
31  
32  
33  
34  
35  
36  
37  
38  
39  
40  
41  
42  
43  
44  
45  
46  
47  
48  
49  
50  
51  
52  
53  
54  
55  
56  
57  
58  
59  
60

## INTRODUCTION

Smoking is the leading global cause of death and disease (1) and data show that there are approximately 7.4 million adult cigarette smokers in the United Kingdom (2, 3). Twenty-six percent of smokers in the UK are aged 50 years or older (3); these individuals tend to have long standing smoking histories, are often from deprived communities and are a population that are likely to be eligible for future lung screening implementation. The associations between smoking prevalence, socioeconomic group and a range of chronic disease outcomes, including lung cancer outcomes are well established, with higher smoking rates and greater lung cancer incidence and mortality (4-6) among people living in deprived areas.

The US Preventive Services Task Force recommends annual low-dose computed tomography screening for those who are high-risk heavy smokers, including adults aged 55-80 years old, with a 30 pack-year history (7). LDCT lung cancer screening has the potential to prompt a smoking cessation attempt and evidence for integrated smoking cessation support is growing (8-11), with research demonstrating promising results for quit rates when using a combined approach of smoking cessation support in a lung screening setting (9).

Prior to implementing appropriate smoking cessation intervention (SCIs) in a lung screening context in the UK, it is important to understand the factors that influence cessation attempts in older, deprived smokers who may be eligible for lung cancer screening. Known barriers to smoking cessation in this population include higher nicotine dependence, less motivation to quit, more life stress, lack of social support and differences in perceptions of smoking (12-14). Smokers from a low socioeconomic background may find quitting more difficult due to lack of support from their family members or community with quit attempts (15), partly due to higher smoking prevalence and normalisation of smoking in their social networks (16).

1  
2  
3 Studies suggest that cessation attempts in older smokers are more likely to fail due to heavy  
4 nicotine dependence and insufficient motivating factors such as self-efficacy to quit (17, 18).  
5  
6  
7

8 Using pharmacotherapy with structured behavioural support to assist smoking cessation has  
9 shown promise with disadvantaged smokers (19, 20). Intensive SCIs involving tailored  
10 pharmacotherapy and behavioural counselling to increase self-efficacy are most effective for  
11 deprived smokers (21). However further research is needed to understand specific  
12 characteristics of behavioural SCIs, such as mode of delivery, setting, intensity and duration,  
13 that could be used for older, deprived smokers.  
14  
15  
16  
17  
18  
19  
20  
21  
22

23 A recent review by Iaccarino (22) attempted to identify the best approach for delivering SCIs  
24 in a lung cancer screening setting and concluded that the optimal strategy remains unclear.  
25

26 There is a need to identify gaps in the evidence surrounding the optimal models for integrated  
27 smoking cessation in a lung screening setting, focusing specifically on a disadvantaged lung  
28 screening eligible population, as well as gain a better understanding of what form of SCI may  
29 work best for this population in the UK.  
30  
31  
32  
33  
34  
35  
36

37 The aims of this systematic review were to identify the behavioural aspects of SCIs for older,  
38 deprived adults who are eligible (or approaching eligibility) for lung cancer screening, and to  
39 explore which elements of the interventions were most effective in reducing smoking  
40 abstinence and modifying psychosocial variables. The findings from the systematic review  
41 will contribute to further understanding of optimal SCIs for individuals who are a target  
42 population for lung cancer screening.  
43  
44  
45  
46  
47  
48  
49  
50

## 51 **METHODS**

52 The systematic review was registered on PROSPERO (CRD42018088956) and followed the  
53 PRISMA guidelines (23). Throughout all stages of the search, data extraction and quality  
54 appraisal, 20% of studies were double-checked for consistency by another member of the  
55  
56  
57  
58  
59  
60



team (RP). All discrepancies were resolved through discussion. Data duplication was managed by removing duplications using a reference management software package (EndNote X9), which were then manually checked.

### Search strategy

The literature was searched from 1900 to November 2018 on electronic databases: Medline, EMBASE, PsychInfo and CINAHL. Search terms related to smoking cessation, SCIs and socioeconomic status were used (Table 1). To limit restricting the search in relation to age, papers were manually screened to identify studies that used a relevant sample.

Table 1: PICO tool

| PICO         | Description                                                                                                                                                                                                                            | Search terms and connectors                                                                                                                                                                            |
|--------------|----------------------------------------------------------------------------------------------------------------------------------------------------------------------------------------------------------------------------------------|--------------------------------------------------------------------------------------------------------------------------------------------------------------------------------------------------------|
| Population   | Individuals from socioeconomically deprived groups, defined through either individual or area level indicators                                                                                                                         | (Depriv* or disadvantage* or inequit* or socioeconomic or socio-economic or sociodemographic or socio-demographic or social class or deprivation group or poverty or low income or social welfare).tw. |
| Intervention | A range of interventions including individual and group counselling, self-help materials, pharmacological interventions (e.g. nicotine replacement therapy), social and environmental support, comprehensive programmes and incentives | Smoking Cessation/ and (intervention* or initiative* or strategy* or program* or scheme* or outcome* or approach* ).tw.                                                                                |
| Comparison   | All study types with a pre/post intervention and/or a control group                                                                                                                                                                    | -                                                                                                                                                                                                      |
| Outcome      | Primary outcome: smoking abstinence<br>Secondary outcome: Moderating variables (e.g. nicotine dependence, quit motivation, self-efficacy, social support and influences)                                                               | ((nicotine or tobacco or smok* or cigarette) adj (quit* or stop* or cess* or cease* or cut down or "giv* up" or reduc* )).tw.                                                                          |

### Study eligibility criteria

1  
2  
3 All searches were restricted to high-income countries (24). Inclusion criteria for the included  
4  
5 publications were; '*Socioeconomically deprived groups*' that defined their sample through  
6  
7 individual level indicators (e.g. educational level, income) or area level indicators (e.g.  
8  
9 postcode). '*Older adults*', defined as aged 50 years + (or when the majority of the sample was  
10  
11 aged 40+) were included to represent a sample at or approaching lung cancer screening age  
12  
13 (25). The review included studies that examined behavioural aspects of SCIs and outcomes  
14  
15 including smoking abstinence and psychosocial variables such as quit motivation, nicotine  
16  
17 dependence, perceived social influence and quit determination.  
18  
19  
20  
21

### 22 **Data extraction and synthesis**

23  
24  
25 Study outcomes, including moderating variables and selected study features were extracted.  
26  
27 Where relevant, statistical associations between variables are described in order to examine  
28  
29 relationships within and between the included studies. Data from qualitative elements of  
30  
31 included studies were extracted and a narrative synthesis was conducted. Due to the  
32  
33 heterogeneity of included studies, a narrative synthesis was performed using guidance  
34  
35 outlined by Popay (26) and organised under relevant behavioural intervention elements.  
36  
37  
38  
39

### 40 **Critical Appraisal**

41  
42 The methodological quality of included studies and risk of bias was assessed using an  
43  
44 adapted Critical Appraisal Skills Programme (CASP) tool (27). Quality was assessed  
45  
46 according to each domain on the checklist including rationale, study design, recruitment,  
47  
48 sample size, data collection and analysis, ethical issues, reporting of findings and contribution  
49  
50 to research. The CASP tool was adapted to address quality of methods for verifying smoking  
51  
52 abstinence, intervention type, and socioeconomic and age variation within the sample.  
53  
54  
55

56 Overall quality was categorised as high, medium or low.  
57  
58

### 59 **Patient and Public Involvement**

1  
2  
3 Patient and public involvement was not adopted for the review.  
4  
5

## 6 **RESULTS**

7

8  
9 Eleven studies met the inclusion criteria (Figure 1). Nine of the 11 studies were quantitative  
10 (28-36) and two were mixed-methods design (37, 38). Three studies were randomised control  
11 trials, with the remaining using a range of non-randomised designs. Two studies (28, 34)  
12 were conducted in a lung screening context. Quality of included studies was high (n=2),  
13 medium (n=5) and low (n=4). Limitations of lower quality studies included measuring but  
14 not reporting a subgroup analysis of age and/or deprivation, study design, limited description  
15 of the intervention and statistically underpowered results. Where available, relevant  
16 statistical values are presented in Table 2.  
17  
18  
19  
20  
21  
22  
23  
24  
25  
26

27  
28 Nine studies used a combination of nicotine replacement therapy and behavioural counselling  
29 (28-30, 32-37). One study used only nicotine replacement therapy (31) and one used  
30 behavioural counselling without nicotine replacement therapy (38). Results are presented in  
31 relation to intervention elements including the behavioural content, setting, intervention  
32 provider and mode and duration of delivery. A sub-heading under each intervention element  
33 presents data on smoking outcomes. Further study characteristics and findings are also  
34 presented in Table 2.  
35  
36  
37  
38  
39  
40  
41  
42  
43  
44  
45  
46  
47  
48  
49  
50  
51  
52  
53  
54  
55  
56  
57  
58  
59  
60

Table 2: Study Characteristic

| Study (Country)                          | Study design                | Sample                                                                                                                                                                                                                                                          | Intervention                                                                                                                                                                                                      | Measure of smoking abstinence     | Summary of findings                                                                                                                                                                                                                                                                                                                                                                                                                                                                                   | Quality appraisal |
|------------------------------------------|-----------------------------|-----------------------------------------------------------------------------------------------------------------------------------------------------------------------------------------------------------------------------------------------------------------|-------------------------------------------------------------------------------------------------------------------------------------------------------------------------------------------------------------------|-----------------------------------|-------------------------------------------------------------------------------------------------------------------------------------------------------------------------------------------------------------------------------------------------------------------------------------------------------------------------------------------------------------------------------------------------------------------------------------------------------------------------------------------------------|-------------------|
| Bade et al (2016) (Germany)              | Randomised controlled trial | 4052 participants from the German lung cancer screening intervention trial. 1535 (62%) male, 950 (38%) female. 1737 (70%) aged 50-59 years, 748 (30%) 60-69 years old. 1823 (73%) 'low' in education and 1594 (65%) 'low' in vocational training.               | Low-dose multislice CT screening and smoking cessation counselling (SCC) delivered by a psychologist in a radiology department. 20 minute counselling followed by at least one telephone call.                    | Self-report at 12 and 24 months   | Proportion of current smokers decreased among screenees (3.4%, p<0.0001), controls (4.5%, p<0.0001), and entire cohort (4.0%, p<0.0001). The magnitude of decrease in smoking rate was larger in SSC participants (screenees 9.6%, p<0.0001; controls 10.4%, p<0.0001) compared to non-SSC participants (screenees 0.8%, p=0.30; controls 1.6%, p=0.03).                                                                                                                                              | High              |
| Bauld et al (2009) (United Kingdom)      | Observational study         | 1785 pharmacy service users. 762 (56%) in the Starting Fresh (SF) group and 311 (76%) in the Smoking Concerns (SC) group were aged 41 years or older. 796 (58%) from SF were in the lowest deprivation quintile, 187 (46%) from SC were in the lowest quintile. | Behavioural support delivered by a trained adviser in a group-based community setting (SC) up to 12 weeks or individually in a pharmacy setting (SF) up to 12 weeks, with access to nicotine replacement therapy. | Biochemical validation at 1 month | 146 (36%) quit rate in SC versus 255 (19%) in SF (OR <sup>1</sup> =1.98; 95% CI <sup>2</sup> 1.90 to 3.08). SC and SF deprived smokers had lower cessation rates (OR=0.677; p=0.015). Cessation rate for pharmacy clients increased sharply with age from 13.4% for age 16-40 to 30.7% for age 61 and over (p<0.001). The increase for group-based clients (SC) was statistically insignificant (p<0.25). Determination to quit was not statistically significant: P = 0.072 (SF) and P = 0.092 (SC). | Medium            |
| Celestin Jr et al (2016) (United States) | Retrospective cohort study  | 8, 549 tobacco users in Louisiana's public hospital facility. 1531 (68%) in the intervention group were aged 45 years and over. 1,196 (57%) were from the lowest 'financial class'.                                                                             | Standard care plus group behavioural counselling in a hospital classroom. 4 one-hour sessions, once a week within a 1-month period.                                                                               | Self-report at 12 months          | Intervention participants had greater odds of sustained abstinence than non-attendees (aOR <sup>3</sup> =1.52; 95% CI 1.21 to 1.90). Higher 12-month quit rate in patients over age 60 (22%) compared to 18-30 year olds (11%) (aOR 2.36; 95% CI 1.58 to 3.52). There was a statistically significant effect of COPD status on quit rate (from UOR 1.01 CI 0.86 to 1.19, to AOR 0.75 CI 0.63 to 0.90).                                                                                                | Low               |
| Copeland et al (2005) (United Kingdom)   | Observational cohort study  | 101 patients from a disadvantaged area of Edinburgh. Mean age for males was 47 years and for females was 44 years.                                                                                                                                              | GP consultation and subsequent prescription of nicotine replacement therapy                                                                                                                                       | Self-report at 3 months           | Post intervention 35 (35%) smoked the same, 46 (45%) were smoking less and 20 (20%) had stopped smoking. Older participants were more likely to have                                                                                                                                                                                                                                                                                                                                                  | Low               |

<sup>1</sup> Odds ratio  
<sup>2</sup> Confidence interval  
<sup>3</sup> Adjusted odds ratio

|    |                                             |                                                       |                                                                                                                                                        |                                                                                                                                                                                                                                                           |                                                              |                                                                                                                                                                                                                                                                                                                                                                                                                                                 |        |
|----|---------------------------------------------|-------------------------------------------------------|--------------------------------------------------------------------------------------------------------------------------------------------------------|-----------------------------------------------------------------------------------------------------------------------------------------------------------------------------------------------------------------------------------------------------------|--------------------------------------------------------------|-------------------------------------------------------------------------------------------------------------------------------------------------------------------------------------------------------------------------------------------------------------------------------------------------------------------------------------------------------------------------------------------------------------------------------------------------|--------|
|    |                                             |                                                       |                                                                                                                                                        |                                                                                                                                                                                                                                                           |                                                              | stopped or to be smoking less ( $p < 0.00$ ).                                                                                                                                                                                                                                                                                                                                                                                                   |        |
| 6  | Lasser et al (2017)<br>(United States)      | Prospective,<br>randomised<br>trial                   | 352 participants randomised (177<br>intervention, 175 control).<br>197 (56%) aged 51-74.<br>193 (55%) with a household yearly<br>income $< \$20,000$ . | Patient navigation and financial<br>incentive (intervention) versus<br>enhanced traditional care<br>(control). Intervention received<br>4 hours of support over 6<br>months. Delivered by patient<br>navigators over the phone or<br>in-person.           | Biochemical<br>validation at<br>12 months                    | 21 (12%) intervention participants quit<br>smoking compared to 4 (2%) control<br>participants (OR=5.8, 95% CI 1.9 to 17.1,<br>$p < 0.00$ ).<br>In the intervention arm ( $n=177$ ), participants<br>aged 51-74 had higher quit rates compared to<br>those aged 21-50 (19 [19.8%] vs 2 [2.0%]; $p <$<br>0.00). Household yearly income of $< \$20,000$<br>had higher quit rates compared to $> \$20,000$<br>(15 [15.5%] vs 4 [8%]; $p = 0.00$ ). | Medium |
| 16 | Neumann et al<br>(2013)<br>(Denmark)        | Observational<br>prospective<br>cohort study          | 20,588 disadvantaged patients (low<br>level of education and receiving<br>unemployment benefits).<br>15,244 (74%) aged 40 years or over.               | 6-week manualised Gold<br>Standard Programme in<br>hospitals and primary care<br>facilities (e.g. pharmacies).<br>Delivered in 5 meetings over 6<br>weeks by a certified staff<br>member. Both group and<br>individual counselling was<br>offered.        | Self-<br>reported<br>continuous<br>abstinence<br>at 6 months | 34% of responders reported 6 months of<br>continuous abstinence.<br>Continuous abstinence was significantly lower<br>in those with less education (30%) versus more<br>education (35%) ( $p < 0.00$ ).<br>For participants with a lower educational level,<br>individual counselling was a predictor of<br>success in smoking cessation (OR=1.31, 95% CI<br>1.05 to 1.63).                                                                      | Medium |
| 25 | Ormston et al<br>(2015)<br>(United Kingdom) | Mixed-<br>methods,<br>quasi-<br>experimental<br>study | 2042 smokers living in deprived areas<br>of Dundee. 70 (54%) aged 45 years and<br>over. 119 (92%) from the two most<br>deprived areas.                 | Financial incentive and<br>behavioural support based on<br>Scottish national guidelines,<br>with pharmacotherapy (Quit4u<br>Scheme) delivered in group<br>(practice nurses) and one-to-<br>one settings (community<br>pharmacists) for up to 12<br>weeks. | Biochemical<br>validation at<br>1, 3 and 12<br>months        | Intervention was responsible for 36% of all quit<br>attempts in the three most deprived areas. 12<br>month quit rate (9.3%) was significantly higher<br>than other Scottish stop smoking services<br>(6.5%) (relative difference 1.443, 95% CI 1.132<br>to 1.839, $p = 0.00$ ).                                                                                                                                                                 | Medium |
| 38 | Park et al (2015)<br>(United States)        | Matched case<br>control study                         | 3336 National Lung Screening Trial<br>participants.                                                                                                    | SCI delivered by a primary care<br>clinician using the 5As.                                                                                                                                                                                               | Self-report<br>at 12                                         | Assist was associated with a 40% increase in<br>quitting (OR=1.40, 95% CI 1.21 to 1.63).                                                                                                                                                                                                                                                                                                                                                        | Medium |

1  
2  
3  
4  
5  
6  
7  
8  
9  
10  
11  
12  
13  
14  
15  
16  
17  
18  
19  
20  
21  
22  
23  
24  
25  
26  
27  
28  
29  
30  
31  
32  
33  
34  
35  
36  
37  
38  
39  
40  
41  
42  
43  
44  
45  
46

|                                               |                             |                                                                                                                                                                                                                                                   |                                                                                                                                                                                                                                                                                                                                                                                |                                                          |                                                                                                                                                                                                                                                                                                                                                                                                                                                                                                                                                                                         |      |
|-----------------------------------------------|-----------------------------|---------------------------------------------------------------------------------------------------------------------------------------------------------------------------------------------------------------------------------------------------|--------------------------------------------------------------------------------------------------------------------------------------------------------------------------------------------------------------------------------------------------------------------------------------------------------------------------------------------------------------------------------|----------------------------------------------------------|-----------------------------------------------------------------------------------------------------------------------------------------------------------------------------------------------------------------------------------------------------------------------------------------------------------------------------------------------------------------------------------------------------------------------------------------------------------------------------------------------------------------------------------------------------------------------------------------|------|
|                                               |                             | Aged 55 to 74 years old.<br>No report of deprivation at baseline.<br>Subgroup analysis performed for education.                                                                                                                                   |                                                                                                                                                                                                                                                                                                                                                                                | months                                                   | Arrange was associated with a 46% increase in quitting (OR=1.46, 95% CI 1.19 to 1.79). Higher educational level was significantly associated with quitting after delivery of each of the 5As (ORs=1.14 to 1.26 for college degree or higher versus high school education). Lower nicotine dependence (OR= 0.94, 95% CI 0.91-0.98), and higher quit motivation (OR=1.28, 95% CI 1.21-1.35) were significantly associated with quitting after delivery of each of the 5As                                                                                                                 |      |
| Sheffer et al (2013)<br>(United States)       | Observational study         | 7267 participants in telephone treatment: 30% aged >50 years, 35% aged 36-49 years.<br>In-person participants: 38% aged >50 years, 38% aged 36-49 years.<br>No report of deprivation at baseline.<br>Subgroup analysis performed for deprivation. | Behavioural counselling-manual driven sessions delivered weekly in-person (healthcare settings) or over the telephone, with free nicotine patches for 6 weeks. Delivered by a health care provider trained in brief evidence-based tobacco dependence interventions.                                                                                                           | Self-report at 3 and 6 months                            | Abstinence rates were higher for in-person counselling (37.7%) versus telephone counselling (30.8%) (p<0.00). No significant difference at 3 months (p=0.73) and 6 months (p=0.27) between in-person (28.2%; 27.2%) and telephone (28.7%; 28.7%). The highest socioeconomic (SES) group was more likely to be abstinent with telephone treatment (SES3: P =0.03; OR = 1.45; 95% CI = 1.04, 2.01). No significant differences between the in-person and telephone for the two lower SES groups (SES1: OR=1.02, 95% CI 0.88 to 1.18, p=0.82; SES2: OR=0.91, 95% CI 0.72 to 1.15, p=0.41). | Low  |
| Sheikhhattari et al (2016)<br>(United States) | Randomised controlled trial | 409 (52%) were aged 48 years and over.<br>Recruited in targeted communities where more than 40% of the households earn less than \$25,000. 531 (72%) were unemployed.                                                                             | Peer-led community-based intervention over three phases. Phase 1 (n=404) – the American Cancer Society’s 4-week Fresh Start smoking cessation curriculum expanded to 12 weeks at health centres and delivered by a doctor, nurse or social worker. Phase 2 (n=398) and Phase 3 (n=163) – tailored group counselling in community venues, delivered by trained peer motivators. | Self-report and biochemical validation at 3 and 6 months | Delivery of services in community settings was a predictor of quitting (OR=2.6, 95% CI 1.7 to 4.2). Smoking cessation increased from 38 (9.4%) in Phase 1 to 84 (21.1%) in Phase 2, and 49 (30.1%) in Phase 3. Phases 2 and 3 were associated with higher odds compared to Phase 1, with adjusted ORs of 2.1 (95% CI 1.3 to 3.5) and 3.7 (95%CI 2.1 to 6.3) respectively. Older age (>48 years versus <48 years) was associated with higher quit rate (13.3% vs 19.1%, p=0.028).                                                                                                        | High |

|    |                      |               |                                      |                                |             |                                               |
|----|----------------------|---------------|--------------------------------------|--------------------------------|-------------|-----------------------------------------------|
| 1  |                      |               |                                      |                                |             |                                               |
| 2  |                      |               |                                      |                                |             |                                               |
| 3  | Stewart et al (2010) | Pilot         | 44 women, aged 25-69, living on low  | Facilitated group support      | Self-report | The mean number of cigarettes smoked daily    |
| 4  | (Canada)             | evaluation of | income in urban areas of Western     | supplemented with one-to-one   | at 3 months | decreased from pre to post-test ( $p=0.00$ ). |
| 5  |                      | a before and  | Canada.                              | support from a mentor. Once a  |             | Among women completing all data collection    |
| 6  |                      | after study   | 23 (52%) aged 40 years or older.     | week, duration of 12 weeks     |             | ( $n=22$ ), the mean number of cigarettes     |
| 7  |                      |               | 18 (39%) participants unemployed, 26 | minimum. Groups facilitated by |             | consumed daily decreased from 0.95 pre-       |
| 8  |                      |               | (62%) on welfare/income support.     | professionals and former       |             | intervention to 0.32 immediately after the    |
| 9  |                      |               |                                      | smokers with the option of     |             | intervention, then increased to 0.64 at 3     |
| 10 |                      |               |                                      | one-to-one from peers in       |             | months post-intervention. Four women          |
| 11 |                      |               |                                      | community centres.             |             | reported sustained cessation.                 |
| 12 |                      |               |                                      |                                |             |                                               |
| 13 |                      |               |                                      |                                |             |                                               |
| 14 |                      |               |                                      |                                |             |                                               |
| 15 |                      |               |                                      |                                |             |                                               |
| 16 |                      |               |                                      |                                |             |                                               |
| 17 |                      |               |                                      |                                |             |                                               |
| 18 |                      |               |                                      |                                |             |                                               |
| 19 |                      |               |                                      |                                |             |                                               |
| 20 |                      |               |                                      |                                |             |                                               |
| 21 |                      |               |                                      |                                |             |                                               |
| 22 |                      |               |                                      |                                |             |                                               |
| 23 |                      |               |                                      |                                |             |                                               |
| 24 |                      |               |                                      |                                |             |                                               |
| 25 |                      |               |                                      |                                |             |                                               |
| 26 |                      |               |                                      |                                |             |                                               |
| 27 |                      |               |                                      |                                |             |                                               |
| 28 |                      |               |                                      |                                |             |                                               |
| 29 |                      |               |                                      |                                |             |                                               |
| 30 |                      |               |                                      |                                |             |                                               |
| 31 |                      |               |                                      |                                |             |                                               |
| 32 |                      |               |                                      |                                |             |                                               |
| 33 |                      |               |                                      |                                |             |                                               |
| 34 |                      |               |                                      |                                |             |                                               |
| 35 |                      |               |                                      |                                |             |                                               |
| 36 |                      |               |                                      |                                |             |                                               |
| 37 |                      |               |                                      |                                |             |                                               |
| 38 |                      |               |                                      |                                |             |                                               |
| 39 |                      |               |                                      |                                |             |                                               |
| 40 |                      |               |                                      |                                |             |                                               |
| 41 |                      |               |                                      |                                |             |                                               |
| 42 |                      |               |                                      |                                |             |                                               |
| 43 |                      |               |                                      |                                |             |                                               |
| 44 |                      |               |                                      |                                |             |                                               |
| 45 |                      |               |                                      |                                |             |                                               |
| 46 |                      |               |                                      |                                |             |                                               |

For peer review only

### **Behavioural intervention content**

Ten studies focused on meeting the individual participant's needs using education and motivational techniques including support and encouragement (28-30, 32-38). In all ten studies, the interventions involved used motivational techniques with varying levels of intensity (Table 2).

Nine studies used interventions that were of higher intensity (28-30, 32, 33, 35-38). These studies involved incorporating specific action planning, tailored by the participant's level of quit motivation (28), using a combination of manual-based teaching and patient education sessions including relapse prevention modules (36), motivational interviewing techniques (32), discussions on the benefits and costs of smoking versus cessation (33), empowering strategies to enhance self-efficacy (38) and cognitive behavioural content (35).

Three studies used financial incentives as part of their intervention (32, 36, 37). A randomised control trial conducted by Lasser et al (32) offered participants \$750 for abstinence at 12-month follow-up. This element of the intervention was combined with patient navigation in which trained navigators identified and discussed salient social contextual factors using motivational interviewing. Ormston et al (37) combined behavioural support with financial incentives to participants upon biochemically verified cessation.

### **Outcomes**

A study by Park et al (34) found that the 'assist' and 'arrange follow-up' elements of a brief SCI based on the 5As (ask, advise, assess, assist and arrange follow-up) alongside lung cancer screening significantly increased the odds of quitting. Results showed that the decrease in smoking rate was larger for participants who received behavioural support compared to those who did not. Smoking abstinence was higher in participants with a higher educational level. (Table 2).



1  
2  
3 Studies of interventions that involved using financial incentives found that older participants  
4 and those with the lowest income had higher quit rates (Table 2). Ormston et al (37) found  
5 that quit rates for the intervention group were significantly higher compared to other stop  
6 smoking services (Table 2). Seventy-one percent of participants reported that the incentive  
7 component was ‘*very*’ or ‘*quite useful*’ in helping them quit, with participants describing it as  
8 a ‘*bonus*’ or ‘*reward*’ to motivate them.  
9

10  
11  
12 Stewart et al (38) reported qualitative data on self-efficacy for quitting and found that  
13 participants thought the education they gained from the intervention increased their  
14 awareness of their smoking habits, reasons why they smoked and the importance of quitting.  
15  
16 Participants also reported an increase in the number of available support sources (e.g. parents,  
17 spouse and friends) along with a significant increase in perceived social support (38).  
18  
19

### 20 21 22 23 24 25 26 27 28 29 30 **Setting**

31  
32 Two studies took place in a lung screening setting (28, 34) and used contrasting forms of  
33 interventions. Park et al (34) offered a brief SCI delivered by a primary care clinician,  
34 whereas Bade et al (28) used a more intensive intervention delivered by a psychologist who  
35 was trained in tobacco treatment. The latter study used a randomised control trial design with  
36 a large sample size and took place in the radiology department before or after the  
37 participant’s screening.  
38  
39

40  
41  
42 Five studies were delivered in a variety of easily accessible community settings including  
43 community pharmacies (29, 33, 37) and community venues such as centres and churches (29,  
44 36-38) (Table 2). Three studies took place at medical facilities such as local medical/health  
45 centres (31, 32, 35) and two studies took place in hospitals (30, 33). One study delivered the  
46 intervention in both community and primary care settings (33).  
47  
48

### 49 50 51 52 53 54 55 56 57 58 59 **Outcomes** 60

1  
2  
3 Stewart et al (38) used a community-based intervention that took place in a local community  
4 centre, familiar to participants. Findings from this small-scale pilot study of female smokers  
5 suggested that the number of cigarettes smoked decreased post-intervention (Table 2).  
6  
7

8  
9  
10 Ormston et al (37) compared intervention delivery in community pharmacies and behavioural  
11 support (both group and one-to one sessions) to other stop smoking services and  
12 demonstrated significantly higher quit rates in deprived communities (Table 2).  
13  
14

15  
16  
17 Bauld et al (29) showed that specialist-led group-based services have higher quit rates  
18 compared to one-to-one services that are provided by pharmacies. Cessation rates for  
19 pharmacy clients increased with age, and more deprived smokers had lower smoking  
20 cessation rates in both the pharmacy-led and one-to-one services (Table 2). Sheikhattari et al  
21 (36) found higher quit rates for community-based participants compared to those receiving  
22 support in clinics during phase 1 of the intervention (Table 2). Results from this study also  
23 showed that older age (defined as over 48 years) was associated with higher quit rates for  
24 participants.  
25  
26  
27  
28  
29  
30  
31  
32  
33  
34

### 35 36 37 **Provider**

38  
39 Interventions were delivered by a range of providers (Table 2). Seven studies employed  
40 healthcare professionals such as general practitioners, primary care practice nurses,  
41 psychologists and pharmacists (28, 30, 31, 33-35, 38). Two studies employed trained peer  
42 motivators to deliver their intervention. Sheikhattari et al (36) used peer motivators who were  
43 former smokers to deliver the behavioural sessions. Peer motivators lived or worked in the  
44 community and were trained in delivering the intervention. Lasser et al (32) used patient  
45 navigators who had completed 10 hours of training in motivational interviewing techniques  
46 and had experience of working in community settings.  
47  
48  
49  
50  
51  
52  
53  
54  
55  
56  
57

### 58 59 **Outcomes**

60

1  
2  
3 Smoking abstinence outcomes varied according to SCI provider (Table 2). A small-scale  
4  
5 observational study by Copeland et al (31) examined the use of nicotine replacement theory  
6  
7 and a brief GP consultation. Results showed that older smokers were more likely to have  
8  
9 stopped smoking (Table 2).

10  
11  
12 Sheikhattari et al (36) demonstrated that subsequent phases of the intervention delivered by  
13  
14 trained peer facilitators were associated with higher odds of quitting compared to the first  
15  
16 phase where intervention delivery was conducted by a doctor, nurse or social worker (Table  
17  
18 2). Findings from Lasser et al (32) demonstrated that older participants and those with a  
19  
20 lower household yearly income had higher quit rates (Table 2).

21  
22  
23 Qualitative data from Stewart et al (38) demonstrated that participants felt peer facilitators  
24  
25 helped to support their cessation efforts as they were able to share personal experiences and  
26  
27 strategies. Participants reported that they were able to learn coping strategies and techniques  
28  
29 from other participants in the group which then helped them with their quit attempt.

### 30 31 32 **Mode and duration**

33  
34  
35 Studies varied in the mode and duration of delivery of SCIs (Table 2). Seven studies  
36  
37 examined both individual and group behavioural counselling sessions (29, 30, 32, 33, 35, 37,  
38  
39 38) (Table 2) and four studies used only one-to-one behavioural support (28, 31, 32, 34).

40  
41  
42 Duration of interventions varied greatly between and within studies (Table 2). The shortest  
43  
44 duration was an intervention embedded in a GP consultation (31) and the longest was 16  
45  
46 weeks of smoking cessation support (38).

### 47 48 49 **Outcomes**

50  
51  
52 Bauld et al (29) showed that participants accessing group-based services were almost twice as  
53  
54 likely as those who used individual pharmacy-based support to have quit smoking at four  
55  
56 weeks (Table 2). Similarly, Celestin et al (30) showed that attendees of group behavioural  
57  
58  
59  
60

1  
2  
3 counselling had significantly higher long-term quit rates compared to non-attendees.

4  
5 Sheikhattari et al (36) used a six-week group-counselling module followed by a six-week  
6  
7 relapse prevention module. Higher odds of quitting were associated with later phases of the  
8  
9 intervention in which community-based group counselling was delivered (Table 2).

10  
11  
12  
13 Lasser et al (32) delivered their one-to-one behavioural support over six months either in-  
14  
15 person or over the telephone, with a goal of four hours per participant. Results demonstrated  
16  
17 that more participants from the intervention group had quit smoking in comparison to the  
18  
19 control group (Table 2). Bade et al (28) also employed behavioural counselling in-person,  
20  
21 with at least one subsequent telephone call for those who had specified a quit date.

22  
23  
24 Participants were offered four telephone calls that lasted around 20 minutes in duration and  
25  
26 findings demonstrated a larger decrease in smoking for screening attendees compared to non-  
27  
28 attendees (Table 2).

29  
30  
31  
32 Sheffer et al (35) delivered both telephone and in-person behavioural counselling. Smoking  
33  
34 abstinence rates were higher for in-person counselling, with smokers from higher  
35  
36 socioeconomic groups more likely to quit after telephone counselling than smokers from  
37  
38 lower socioeconomic groups. Neumann et al (33) offered either group or individual  
39  
40 counselling and demonstrated that for those with a lower educational level, individual  
41  
42 counselling was a predictor of smoking cessation (Table 2).

### 43 44 45 46 **Moderating variables**

47  
48  
49 Seven studies reported limited data on moderating variables (28-30, 32, 34-36). Bauld et al  
50  
51 (29) found that smokers who reported being '*extremely determined*' to quit were more likely  
52  
53 to be successful in their quit attempt. Celestin et al (30) demonstrated that COPD status had a  
54  
55 statistically significant effect on quit rates (Table 2) and Park and colleagues (34) showed that  
56  
57 lower nicotine dependence and higher quit motivation were significantly associated with  
58  
59  
60

1  
2  
3 quitting after the delivery of each of the 5As. Three RCTs demonstrated that participants who  
4 had a lower Fagerstrom score (36), who were contemplating quitting (32) and reported high  
5 readiness to quit (28) at baseline were more likely to have abstained from smoking post-  
6  
7 intervention.  
8  
9  
10  
11  
12

## 13 **DISCUSSION**

14  
15  
16 To our knowledge, this systematic review is the first to examine the influence of behavioural  
17 SCIs for an older, deprived population. The majority of included studies used a combination  
18 of pharmacotherapy and a form of behavioural counselling, supporting previous evidence that  
19 a combined approach is the most effective for older, deprived smokers (21). Additionally,  
20 findings relating to the intensity, provider, mode, duration and setting of behavioural  
21 counselling are encouraging. Behavioural counselling delivered in a community setting and  
22 tailored to individual needs appeared to demonstrate a positive impact on smoking cessation  
23 outcomes.  
24  
25  
26  
27  
28  
29  
30  
31  
32  
33  
34

35 Behavioural interventions identified in the current review used a range of approaches and  
36 although none of the included studies explicitly described their intervention as "tailored",  
37 many used a form of behavioural counselling that was implicitly flexible according to the  
38 needs of the individuals. Interventions were implemented in locations that addressed barriers  
39 to access, such as local community centres, and intervention content was driven by the  
40 individual's psychological needs (29, 36-38). Previous research suggests that in order for  
41 people to access stop smoking services, the appointments should be flexible and accessible  
42 (39).  
43  
44  
45  
46  
47  
48  
49  
50  
51  
52  
53

54 The optimal mode and duration of intervention was unclear from our review, with findings  
55 suggesting varying success for both group and one-to-one behavioural support. The current  
56 results reflect similar findings from a review conducted in the UK. Bauld et al (21) concluded  
57  
58  
59  
60

1  
2  
3 that due to a dearth of studies examining subpopulations of smokers, further research is  
4  
5 needed to determine the most effective models of treatment for smoking cessation and their  
6  
7 efficacy with these subgroups (21). The current review did, however, demonstrate that certain  
8  
9 aspects of behavioural interventions, such as incentives, the use of peer facilitators and more  
10  
11 intensive counselling are promising for encouraging cessation in older, deprived smokers.  
12  
13 Additionally, limited data regarding the influence of moderating variables suggests that  
14  
15 factors such as nicotine dependence, quit motivation and pre-existing health conditions such  
16  
17 as COPD can impact the effectiveness of smoking cessation interventions. Future research  
18  
19 should aim to understand the needs and preferences of older, deprived smokers and focus on  
20  
21 psychosocial mechanisms that can be targeted in more holistic level interventions.  
22  
23  
24  
25

26  
27 The eleven studies included in the review were heterogeneous in design, SCI modality,  
28  
29 sample size, intervention timing and measurement of smoking abstinence. Some of the  
30  
31 included studies did not report confidence intervals, thus making it difficult to interpret  
32  
33 findings. Only three of the studies included were randomised control trials, of which one was  
34  
35 underpowered (32), thus the effectiveness results across the studies were modest. Chen and  
36  
37 Wu (40) also identified the need for controlled trials of SCIs for older smoker, in order to  
38  
39 better understand the most suitable form of intervention for this population. Similarly to  
40  
41 findings from Pineiro et al's systematic review (41), the studies in the current review did not  
42  
43 consistently use biochemical verification of smoking cessation, with most relying on self-  
44  
45 reported smoking cessation (Table 2).  
46  
47  
48  
49

50  
51 Various design aspects of the included studies, including the use of non-randomised methods,  
52  
53 limited the extent to which firm conclusions can be drawn about the effectiveness of  
54  
55 behavioural SCIs for older, deprived smokers. Only two studies included qualitative process  
56  
57 evaluation data, limiting the ability to understand why specific intervention characteristics  
58  
59 were more or less likely to influence smoking cessation outcomes. Evidence suggests that  
60

1  
2  
3 smokers from disadvantaged backgrounds face particular obstacles to successful quitting such  
4 as lack of support, higher nicotine dependence and life stress (20). Further mixed-methods  
5 research is therefore warranted to understand why some forms of SCI support may be more  
6 suited to mitigating these barriers in the target population.  
7  
8  
9  
10  
11

12  
13 The findings indicate a clear lack of evidence from large-scale trials of effectiveness in a lung  
14 screening context as well as a lack of data reporting psychosocial moderators of cessation for  
15 older, deprived smokers. We acknowledge methodological limitations of the present  
16 systematic review. By restricting the inclusion criteria for age and socioeconomic group,  
17 several potentially relevant studies were excluded. For example, telephone-based counselling  
18 for smokers undergoing lung cancer screening, involving messages about risks of smoking in  
19 the context of lung scan results, can improve self-efficacy for quitting and the likelihood of a  
20 successful quit attempt (42). However, our review highlights the current absence of robust  
21 evidence regarding behavioural SCIs that are effective for the lung screening eligible  
22 population of older deprived smokers.  
23  
24  
25  
26  
27  
28  
29  
30  
31  
32  
33  
34  
35

## 36 **CONCLUSION**

37  
38  
39 Our systematic review demonstrates the potential for tailored, multimodal SCIs for older,  
40 deprived smokers that can be embedded within disadvantaged communities. With the  
41 prospect of lung cancer screening being implemented in the UK and Europe in the near  
42 future, this research adds to the evidence base regarding promising SCIs for older, deprived  
43 populations who will benefit most from lung screening and integrated smoking cessation  
44 support. Further studies to understand the psychosocial barriers to quitting in the target  
45 population should be conducted to inform the design and conduct of high-quality trials of  
46 intervention effectiveness in older, deprived smokers.  
47  
48  
49  
50  
51  
52  
53  
54  
55  
56  
57  
58  
59  
60

## DECLARATION

### Competing Interests

The authors declare that they have no competing interests.

### Data availability statement

All data derived from the review search (i.e. included papers and their relevant references) have been included in the paper along with the search terms that were used.

### Funding statement

This study was funded by School of Medicine, Cardiff University. RP is funded by a Cancer Research UK Population Research Committee Post-Doctoral Fellowship. AN's and MM's posts are supported by Marie Curie core grant funding (grant reference: MCCCFCO-11-C).

### Authors' contribution

Pamela Smith, Prof Kate Brain, Mala Mann, Prof Annmarie Nelson and Dr Graham Moore were responsible for the concept, overall design and conduct of the review. MM gave additional support and advice on methodology including the search strategy. PS was responsible for collection of data and manuscript preparation. Dr Ria Poole double-checked 20% of included abstracts and full-texts. RP, MM, AN, GM and KB reviewed the edited manuscript preparation. All authors were involved in the interpretation of the results and approved the final version of the manuscript.

### Acknowledgements

We would like to thank Dr Grace McCutchan for her support and guidance throughout the review process.



## References

1. World Health Organisation. Report on the Global Tobacco Epidemic 2008 [Available from: [www.who.int/tobacco/mpower/en/](http://www.who.int/tobacco/mpower/en/)].
2. Office for National Statistics, Adult smoking habits in the UK: 2017. 2018 [cited 2019 February]. Available from: <https://www.ons.gov.uk/peoplepopulationandcommunity/healthandsocialcare/healthandlifeexpectancies/bulletins/adultsmokinghabitsingreatbritain/2017>.
3. Office for National Statistics.: Adult smoking habits in Great Britain 2017. ; 2017 [Available from: <http://ash.org.uk/category/information-and-resources/fact-sheets/>].
4. Information Services Division (ISD). : NHS National Services Scotland; 2012 [Available from: <http://www.isdscotland.org/Health-Topics/Cancer/Publications/2012-04-24/2012-04-24-Cancer-Incidence-report.pdf?49042910338>].
5. Welsh Cancer Intelligence and Surveillance Unit: Public Health Wales; 2015 [
6. Shack L, Jordan C, Thomson CS, Mak V, Moller H, Registries UKAoC. Variation in incidence of breast, lung and cervical cancer and malignant melanoma of skin by socioeconomic group in England. *BMC Cancer*. 2008;8:271.
7. Humphrey LL, Deffebach M, Pappas M, Baumann C, Artis K, Mitchell JP, et al. Screening for lung cancer with low-dose computed tomography: a systematic review to update the US Preventive services task force recommendation. *Ann Intern Med*. 2013;159(6):411-20.
8. Ashraf H, Tonnesen P, Holst Pedersen J, Dirksen A, Thorsen H, Dossing M. Effect of CT screening on smoking habits at 1-year follow-up in the Danish Lung Cancer Screening Trial (DLCST). *Thorax*. 2009;64(5):388-92.
9. Brain K, Carter B, Lifford KJ, Burke O, Devaraj A, Baldwin DR, et al. Impact of low-dose CT screening on smoking cessation among high-risk participants in the UK Lung Cancer Screening Trial. *Thorax*. 2017;72(10):912-8.
10. Tammemagi MC, Berg CD, Riley TL, Cunningham CR, Taylor KL. Impact of lung cancer screening results on smoking cessation. *J Natl Cancer Inst*. 2014;106(6):dju084.
11. van der Aalst CM, van den Bergh KA, Willemsen MC, de Koning HJ, van Klaveren RJ. Lung cancer screening and smoking abstinence: 2 year follow-up data from the Dutch-Belgian randomised controlled lung cancer screening trial. *Thorax*. 2010;65(7):600-5.
12. Bryant J, Bonevski B, Paul C. A survey of smoking prevalence and interest in quitting among social and community service organisation clients in Australia: a unique opportunity for reaching the disadvantaged. *BMC Public Health*. 2011;11:827.
13. Hiscock R, Judge K, Bauld L. Social inequalities in quitting smoking: what factors mediate the relationship between socioeconomic position and smoking cessation? *J Public Health (Oxf)*. 2011;33(1):39-47.
14. Vangeli E, West R. Sociodemographic differences in triggers to quit smoking: findings from a national survey. *Tob Control*. 2008;17(6):410-5.
15. Chandola T, Head J, Bartley M. Socio-demographic predictors of quitting smoking: how important are household factors? *Addiction*. 2004;99(6):770-7.
16. Mermelstein R, Cohen S, Lichtenstein E, Baer JS, Kamarck T. Social support and smoking cessation and maintenance. *J Consult Clin Psychol*. 1986;54(4):447-53.
17. Benowitz NL. Nicotine addiction. *N Engl J Med*. 2010;362(24):2295-303.
18. Fiore MC, Jaen CR, Baker TB, Bailey WC, Benowitz NL, Curry SJ, et al. Treating tobacco use and dependence: 2008 update US Public Health Service Clinical Practice Guideline executive summary. *Respiratory Care*. 2008;53(9):1217-22.
19. Bauld L, Judge K, Platt S. Assessing the impact of smoking cessation services on reducing health inequalities in England: observational study. *Tob Control*. 2007;16(6):400-4.
20. Hiscock R, Bauld L, Amos A, Fidler JA, Munafò M. Socioeconomic status and smoking: a review. *Ann N Y Acad Sci*. 2012;1248:107-23.

- 1
- 2
- 3
- 4 21. Bauld L, Bell K, McCullough L, Richardson L, Greaves L. The effectiveness of NHS smoking
- 5 cessation services: a systematic review. *J Public Health (Oxf)*. 2010;32(1):71-82.
- 6 22. Iaccarino JM, Duran C, Slatore CG, Wiener RS, Kathuria H. Combining smoking cessation
- 7 interventions with LDCT lung cancer screening: A systematic review. *Prev Med*. 2019;121:24-32.
- 8 23. Moher D, Liberati A, Tetzlaff J, Altman DG, Group P. Preferred reporting items for systematic
- 9 reviews and meta-analyses: the PRISMA statement. *J Clin Epidemiol*. 2009;62(10):1006-12.
- 10 24. The World Bank [cited October 2018]. Available from: [https://data.worldbank.org/income-](https://data.worldbank.org/income-level/high-income)
- 11 [level/high-income](https://data.worldbank.org/income-level/high-income).
- 12 25. Oudkerk M, Devaraj A, Vliegenthart R, Henzler T, Prosch H, P Heussel C, et al. European
- 13 position statement on lung cancer screening2017. e754-e66 p.
- 14 26. Popay JR, H. M.; Sowden, A.; Petticrew, M.; Arai, L.; Rodgers, M.; Britten, N. . Guidance on
- 15 the conduct of narrative synthesis in sytematic reviews: Institute for Health Research; 2006 [
- 16 27. Singh J. Critical Appraisal Skills Programme. CASP Appraisal Tools2013. 76 p.
- 17 28. Bade M, Bahr V, Brandt U, Eigentopf A, Bruchert T, Gross ML, et al. Effect of smoking
- 18 cessation counseling within a randomised study on early detection of lung cancer in Germany.
- 19 2016:959-68, 2016 May.
- 20 29. Bauld L, Chesterman J, Ferguson J, Judge K. A comparison of the effectiveness of group-
- 21 based and pharmacy-led smoking cessation treatment in Glasgow. 2009:308-16, 2009 Feb.
- 22 30. Celestin MD, Tseng TS, Moody-Thomas S, Jones-Winn K, Hayes C, Guillory D, et al.
- 23 Effectiveness of group behavioral counseling on long-term quit rates in primary health care.
- 24 *Translational Cancer Research*. 2016;5(Supplement5):972-82.
- 25 31. Copeland L, Robertson R, Elton R. What happens when GPs proactively prescribe NRT
- 26 patches in a disadvantaged community. *Scottish Medical Journal*. 2005:64-8, 2005 May.
- 27 32. Lasser KE, Quintiliani LM, Truong V, Xuan Z, Murillo J, Jean C, et al. Effect of Patient
- 28 Navigation and Financial Incentives on Smoking Cessation Among Primary Care Patients at an Urban
- 29 Safety-Net Hospital: A Randomized Clinical Trial. *JAMA Internal Medicine*. 2017:1798-807, 2017 Dec
- 30 01.
- 31 33. Neumann T, Rasmussen M, Ghith N, Heitmann BL, Tonnesen H. The Gold Standard
- 32 Programme: smoking cessation interventions for disadvantaged smokers are effective in a real-life
- 33 setting. *Int J Environ Res Public Health*. 2013:e9, 2013 Nov.
- 34 34. Park ER, Gareen IF, Japuntich S, Lennes I, Hyland K, De Mello S, et al. Primary care provider-
- 35 delivered smoking cessation interventions and smoking cessation among participants in the national
- 36 lung screening trial. *JAMA Internal Medicine*. 2015;175(9):1509-16.
- 37 35. Sheffer C, Stitzer M, Landes R, Brackman SL, Munn T. In-Person and Telephone Treatment of
- 38 Tobacco Dependence: A Comparison of Treatment Outcomes and Participant Characteristics.
- 39 *American Journal of Public Health*. 2013;103(8):E74-E82.
- 40 36. Sheikhattari P, Apata J, Kamangar F, Schutzman C, O'Keefe A, Buccheri J, et al. Examining
- 41 Smoking Cessation in a Community-Based Versus Clinic-Based Intervention Using Community-Based
- 42 Participatory Research. 2016:1146-52, 2016 Dec.
- 43 37. Ormston R, van der Pol M, Ludbrook A, McConville S, Amos A. quit4u: the effectiveness of
- 44 combining behavioural support, pharmacotherapy and financial incentives to support smoking
- 45 cessation. 2015:121-33, 2015 Feb.
- 46 38. Stewart MJ, Kushner KE, Greaves L, Letourneau N, Spitzer D, Boscoe M. Impacts of a support
- 47 intervention for low-income women who smoke. 2010:1901-9, 2010 Dec.
- 48 39. Venn A, Dickinson A, Murray R, Jones L, Li J, Parrott S, et al. Effectiveness of a mobile, drop-
- 49 in stop smoking service in reaching and supporting disadvantaged UK smokers to quit. *Tob Control*.
- 50 2016;25(1):33-8.
- 51 40. Chen D, Wu LT. Smoking cessation interventions for adults aged 50 or older: A systematic
- 52 review and meta-analysis. *Drug Alcohol Depend*. 2015;154:14-24.
- 53
- 54
- 55
- 56
- 57
- 58
- 59
- 60

- 1  
2  
3 41. Pineiro B, Simmons VN, Palmer AM, Correa JB, Brandon TH. Smoking cessation interventions  
4 within the context of Low-Dose Computed Tomography lung cancer screening: A systematic review.  
5 Lung Cancer. 2016;98:91-8.  
6  
7 42. Zeliadt SB, Greene PA, Krebs P, Klein DE, Feemster LC, Au DH, et al. A Proactive Telephone-  
8 Delivered Risk Communication Intervention for Smokers Participating in Lung Cancer Screening: A  
9 Pilot Feasibility Trial. Journal of Smoking Cessation. 2018;13(3):137-44.  
10  
11  
12  
13  
14  
15  
16  
17  
18  
19  
20  
21  
22  
23  
24  
25  
26  
27  
28  
29  
30  
31  
32  
33  
34  
35  
36  
37  
38  
39  
40  
41  
42  
43  
44  
45  
46  
47  
48  
49  
50  
51  
52  
53  
54  
55  
56  
57  
58  
59  
60

For peer review only

1  
2  
3  
4  
5  
6  
7  
8  
9  
10  
11  
12  
13  
14  
15  
16  
17  
18  
19  
20  
21  
22  
23  
24  
25  
26  
27  
28  
29  
30  
31  
32  
33  
34  
35  
36  
37  
38  
39  
40  
41  
42  
43  
44  
45  
46  
47  
48  
49  
50  
51  
52  
53  
54  
55  
56  
57  
58  
59  
60

**FIGURE LEGEND**

Figure 1: PRISMA Flow Diagram

For peer review only

Figure 1: PRISMA Flow Diagram



Peer review only



# PRISMA 2009 checklist

| Section/topic                      | #  | Checklist item                                                                                                                                                                                                                                                                                              | Reported on page # |
|------------------------------------|----|-------------------------------------------------------------------------------------------------------------------------------------------------------------------------------------------------------------------------------------------------------------------------------------------------------------|--------------------|
| <b>TITLE</b>                       |    |                                                                                                                                                                                                                                                                                                             |                    |
| Title                              | 1  | Identify the report as a systematic review, meta-analysis, or both.                                                                                                                                                                                                                                         | 1                  |
| <b>ABSTRACT</b>                    |    |                                                                                                                                                                                                                                                                                                             |                    |
| Structured summary                 | 2  | Provide a structured summary including, as applicable: background; objectives; data sources; study eligibility criteria, participants, and interventions; study appraisal and synthesis methods; results; limitations; conclusions and implications of key findings; systematic review registration number. | 2                  |
| <b>INTRODUCTION</b>                |    |                                                                                                                                                                                                                                                                                                             |                    |
| Rationale                          | 3  | Describe the rationale for the review in the context of what is already known.                                                                                                                                                                                                                              | 3,4                |
| Objectives                         | 4  | Provide an explicit statement of questions being addressed with reference to participants, interventions, comparisons, outcomes, and study design (PICOS).                                                                                                                                                  | 3,4                |
| <b>METHODS</b>                     |    |                                                                                                                                                                                                                                                                                                             |                    |
| Protocol and registration          | 5  | Indicate if a review protocol exists, if and where it can be accessed (e.g., Web address), and, if available, provide registration information including registration number.                                                                                                                               | 5                  |
| Eligibility criteria               | 6  | Specify study characteristics (e.g., PICOS, length of follow-up) and report characteristics (e.g., years considered, language, publication status) used as criteria for eligibility, giving rationale.                                                                                                      | 6                  |
| Information sources                | 7  | Describe all information sources (e.g., databases with dates of coverage, contact with study authors to identify additional studies) in the search and date last searched.                                                                                                                                  | 6                  |
| Search                             | 8  | Present full electronic search strategy for at least one database, including any limits used, such that it could be repeated.                                                                                                                                                                               |                    |
| Study selection                    | 9  | State the process for selecting studies (i.e., screening, eligibility, included in systematic review, and, if applicable, included in the meta-analysis).                                                                                                                                                   | 6,7                |
| Data collection process            | 10 | Describe method of data extraction from reports (e.g., piloted forms, independently, in duplicate) and any processes for obtaining and confirming data from investigators.                                                                                                                                  | 6                  |
| Data items                         | 11 | List and define all variables for which data were sought (e.g., PICOS, funding sources) and any assumptions and simplifications made.                                                                                                                                                                       | 6                  |
| Risk of bias in individual studies | 12 | Describe methods used for assessing risk of bias of individual studies (including specification of whether this was done at the study or outcome level), and how this information is to be used in any data synthesis.                                                                                      | 7                  |
| Summary measures                   | 13 | State the principal summary measures (e.g., risk ratio, difference in means).                                                                                                                                                                                                                               | n/a                |
| Synthesis of results               | 14 | Describe the methods of handling data and combining results of studies, if done, including measures of consistency (e.g., $I^2$ ) for each meta-analysis.                                                                                                                                                   | n/a                |

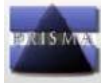

# PRISMA 2009 checklist

| Section/topic                 | #  | Checklist item                                                                                                                                                                                           | Reported on page # |
|-------------------------------|----|----------------------------------------------------------------------------------------------------------------------------------------------------------------------------------------------------------|--------------------|
| Risk of bias across studies   | 15 | Specify any assessment of risk of bias that may affect the cumulative evidence (e.g., publication bias, selective reporting within studies).                                                             | 7                  |
| Additional analyses           | 16 | Describe methods of additional analyses (e.g., sensitivity or subgroup analyses, meta-regression), if done, indicating which were pre-specified.                                                         | n/a                |
| <b>RESULTS</b>                |    |                                                                                                                                                                                                          |                    |
| Study selection               | 17 | Give numbers of studies screened, assessed for eligibility, and included in the review, with reasons for exclusions at each stage, ideally with a flow diagram.                                          | Supp. File, 8      |
| Study characteristics         | 18 | For each study, present characteristics for which data were extracted (e.g., study size, PICOS, follow-up period) and provide the citations.                                                             | 13-18              |
| Risk of bias within studies   | 19 | Present data on risk of bias of each study and, if available, any outcome level assessment (see item 12).                                                                                                | 13-18              |
| Results of individual studies | 20 | For all outcomes considered (benefits or harms), present, for each study: (a) simple summary data for each intervention group (b) effect estimates and confidence intervals, ideally with a forest plot. | 9-12               |
| Synthesis of results          | 21 | Present results of each meta-analysis done, including confidence intervals and measures of consistency.                                                                                                  | n/a                |
| Risk of bias across studies   | 22 | Present results of any assessment of risk of bias across studies (see Item 15).                                                                                                                          | n/a                |
| Additional analysis           | 23 | Give results of additional analyses, if done (e.g., sensitivity or subgroup analyses, meta-regression [see Item 16]).                                                                                    | n/a                |
| <b>DISCUSSION</b>             |    |                                                                                                                                                                                                          |                    |
| Summary of evidence           | 24 | Summarize the main findings including the strength of evidence for each main outcome; consider their relevance to key groups (e.g., healthcare providers, users, and policy makers).                     | 18-20              |
| Limitations                   | 25 | Discuss limitations at study and outcome level (e.g., risk of bias), and at review-level (e.g., incomplete retrieval of identified research, reporting bias).                                            | 18-20              |
| Conclusions                   | 26 | Provide a general interpretation of the results in the context of other evidence, and implications for future research.                                                                                  | 20                 |
| <b>FUNDING</b>                |    |                                                                                                                                                                                                          |                    |
| Funding                       | 27 | Describe sources of funding for the systematic review and other support (e.g., supply of data); role of funders for the systematic review.                                                               | 21                 |

From: Moher D, Liberati A, Tetzlaff J, Altman DG, The PRISMA Group (2009). Preferred Reporting Items for Systematic Reviews and Meta-Analyses: The PRISMA Statement. PLoS Med 6(6): e1000097. doi:10.1371/journal.pmed1000097

For more information, visit: [www.prisma-statement.org](http://www.prisma-statement.org).
